# Supplementary material for: Frequent gene flow blurred taxonomic boundaries of sections in Lilium L. (Liliaceae)
Source: PubMed Central journal article supplement (PMC5571923; doi:10.1371/journal.pone.0183209), 2017-08-25

# **S1 Appendix. Maximum likelihood phylogenies of 20 EST loci.**

# Lf108

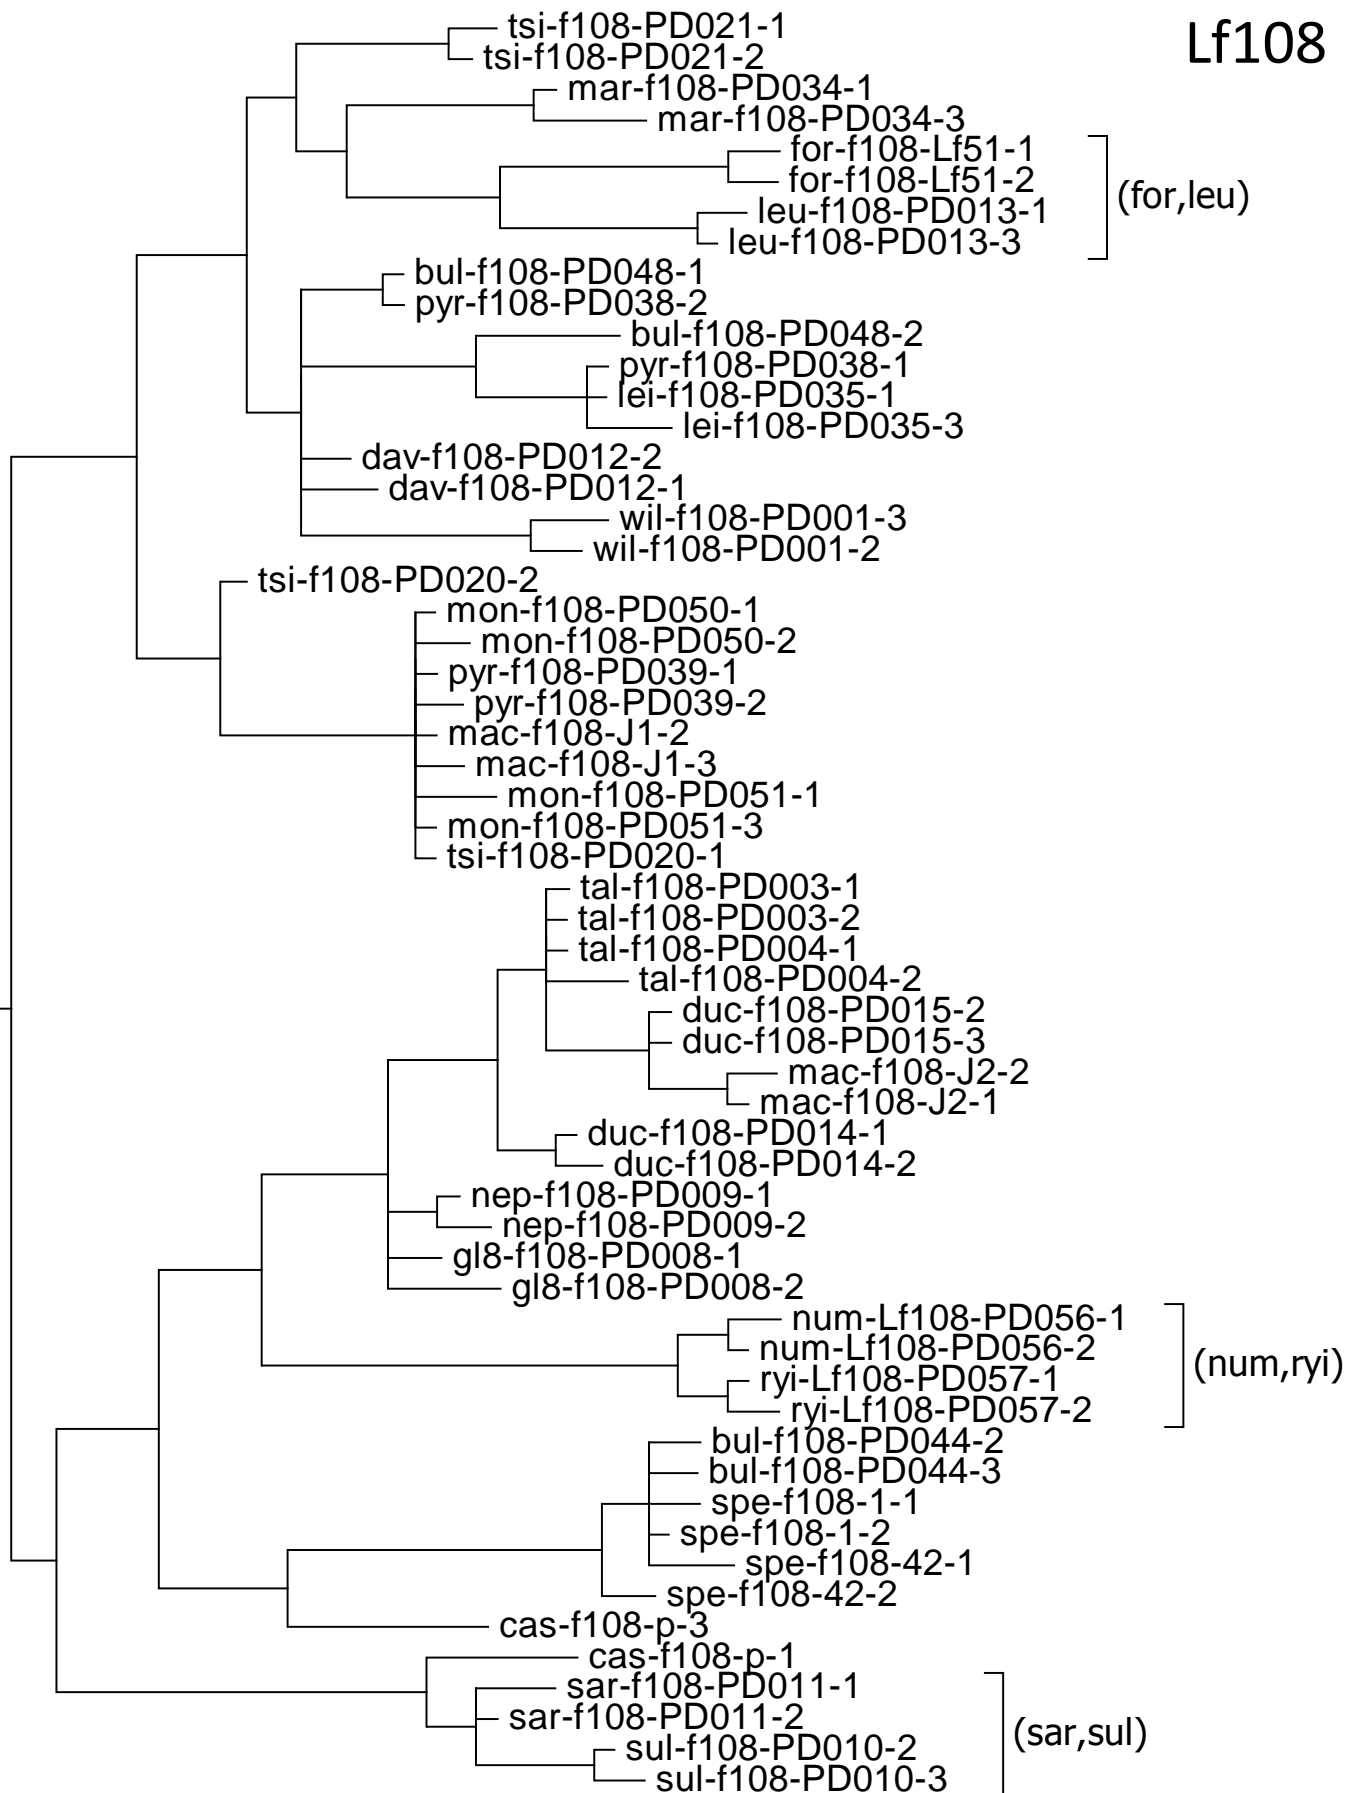

0.005

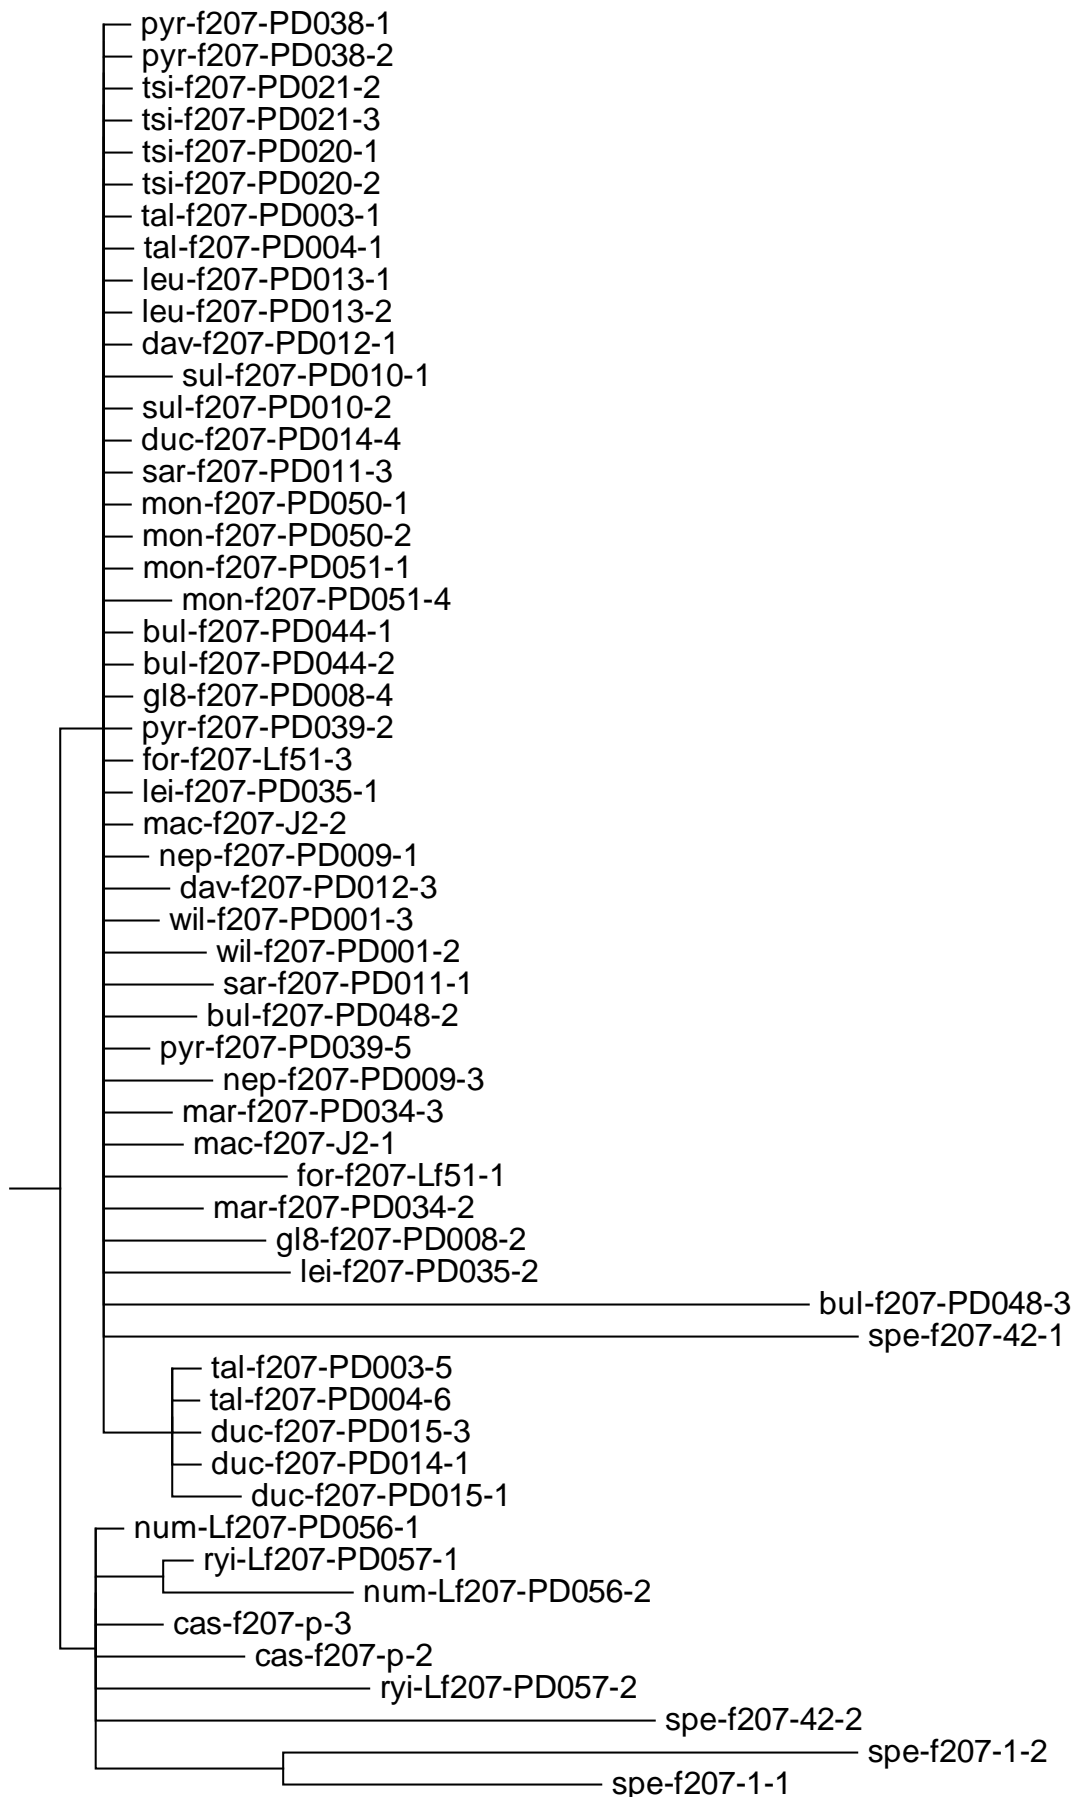

0.002

# Lf210

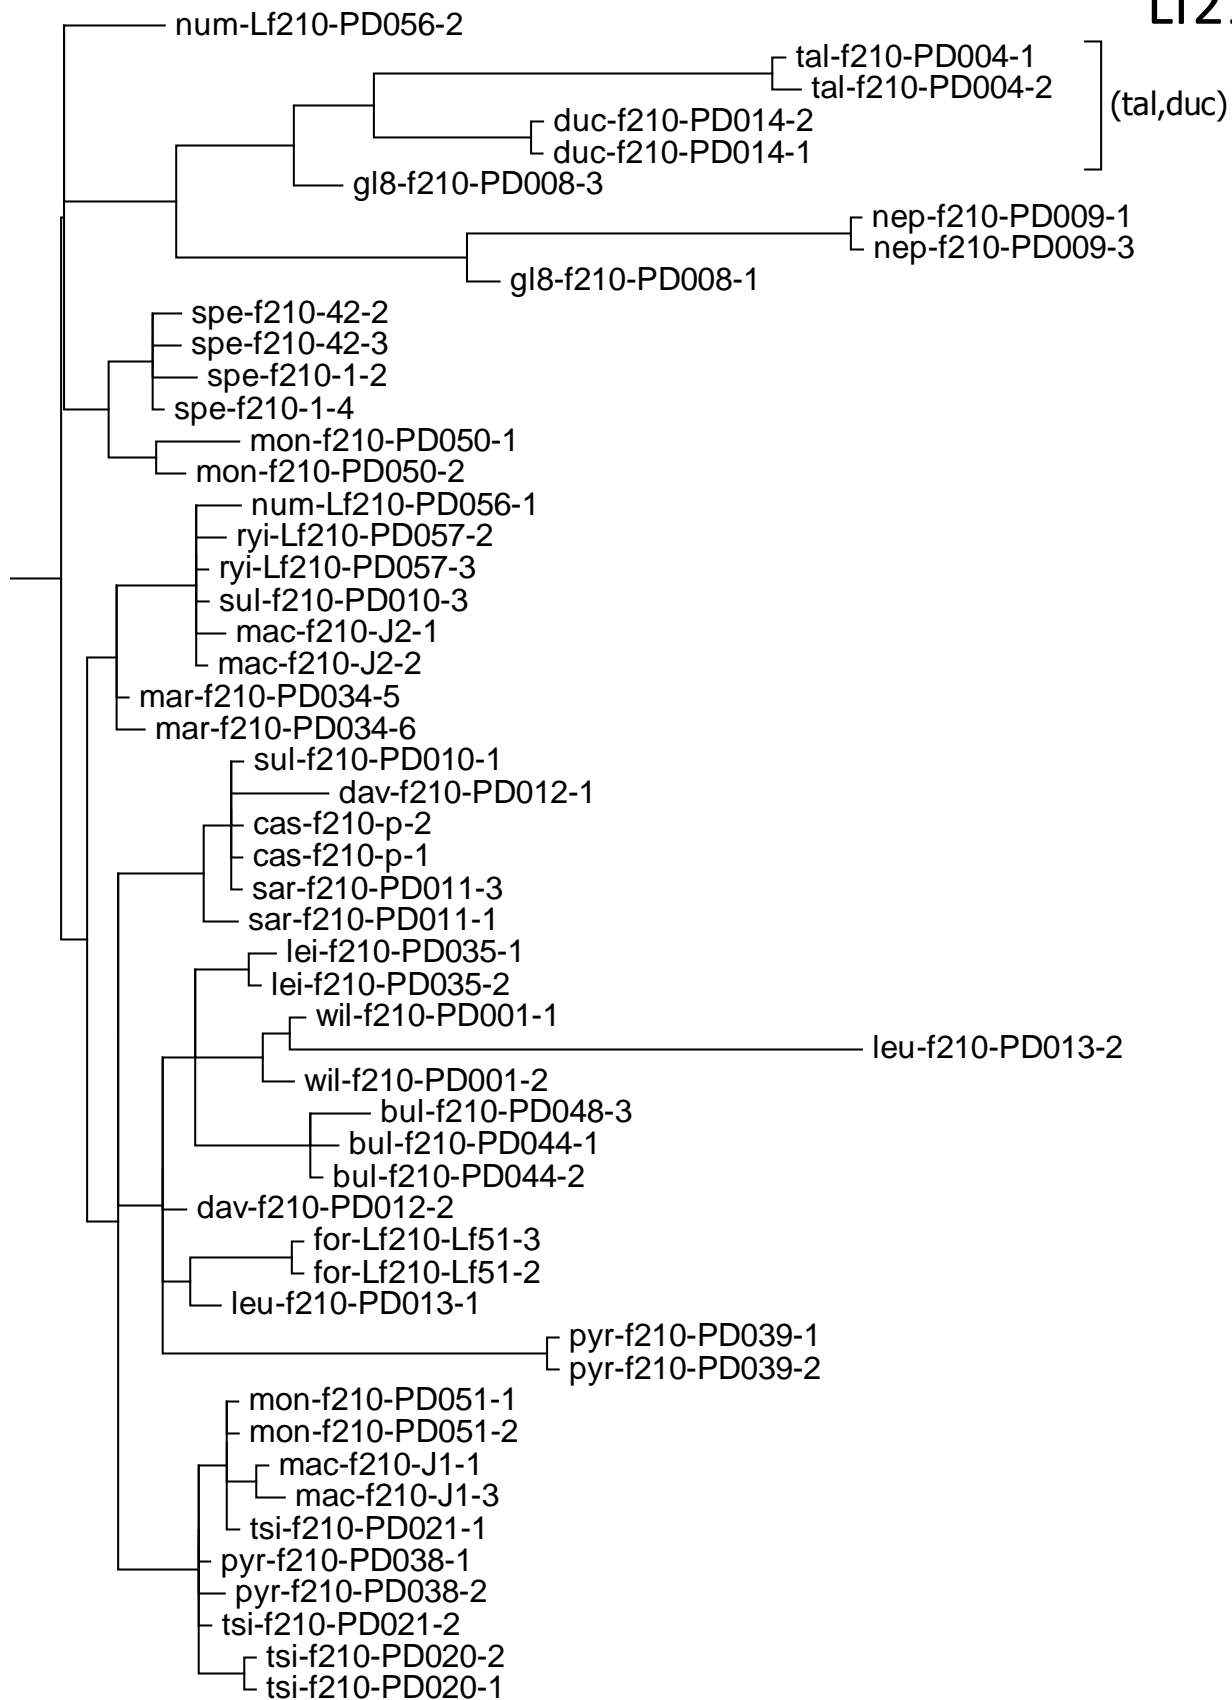

0.01

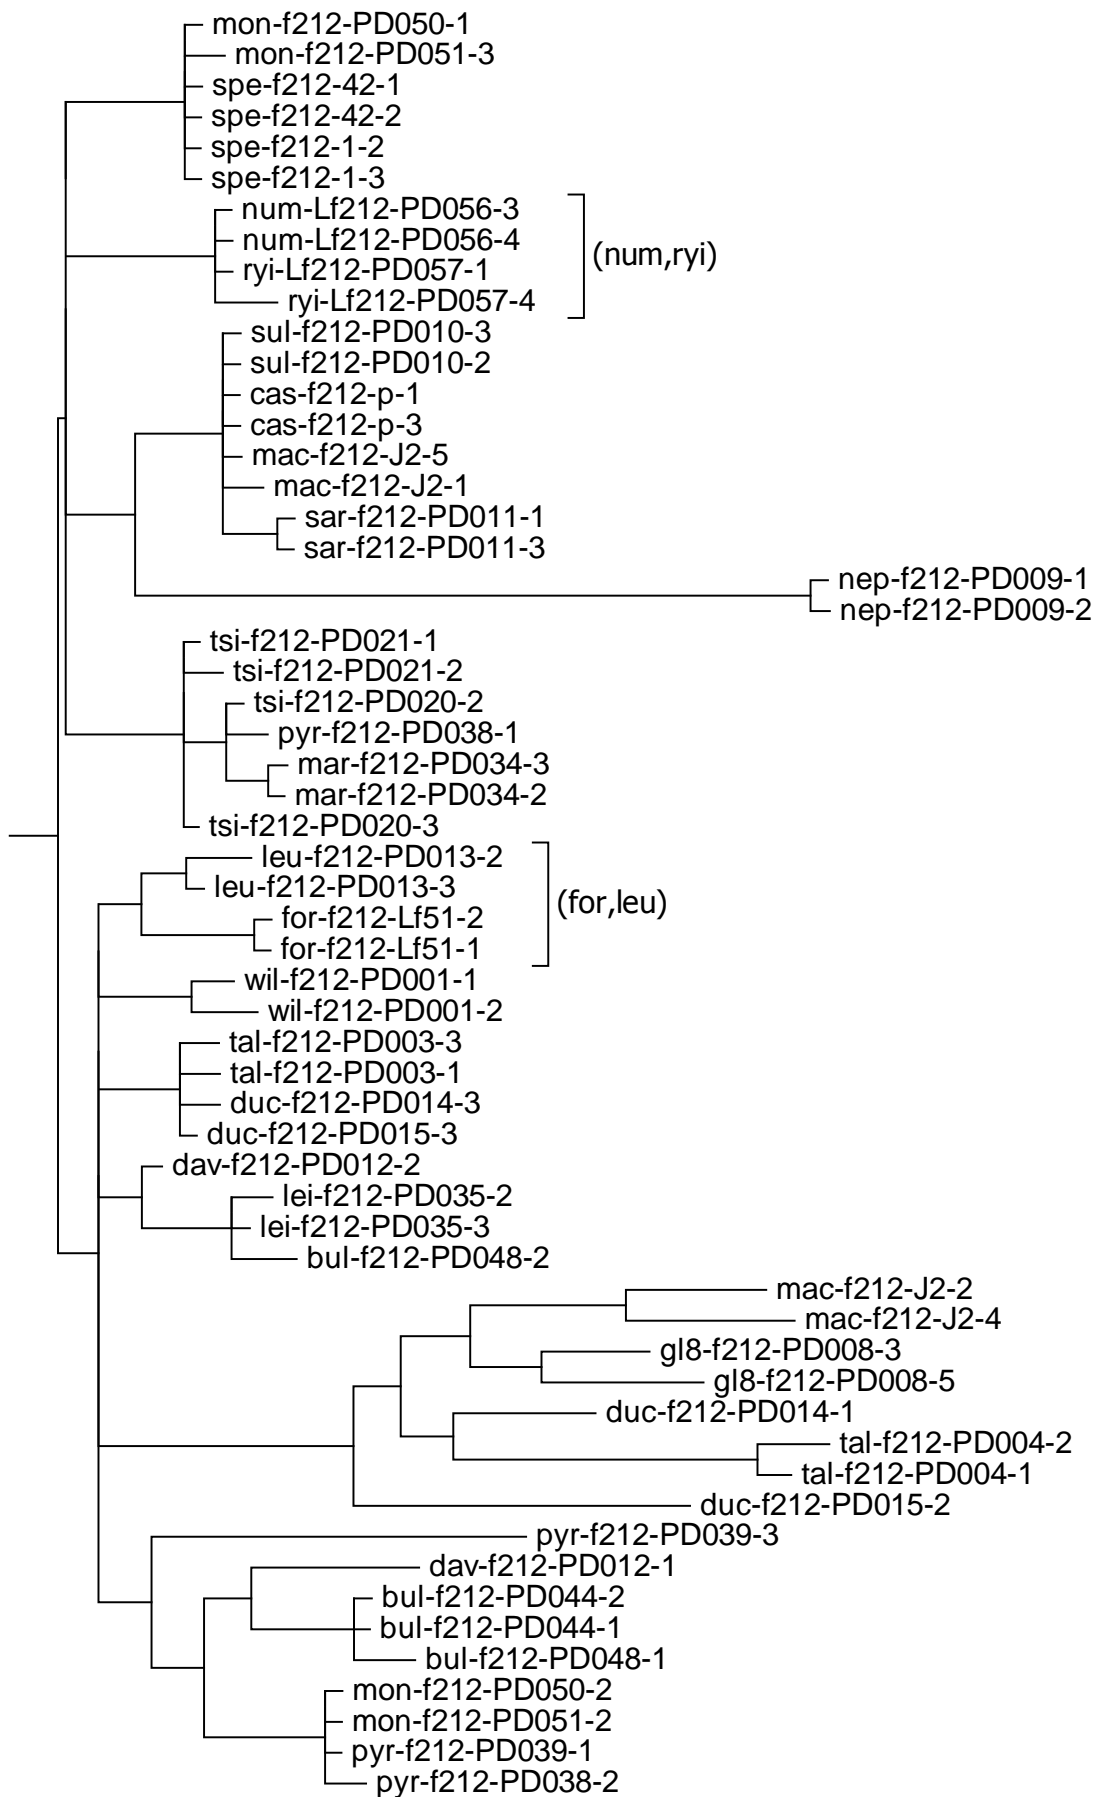

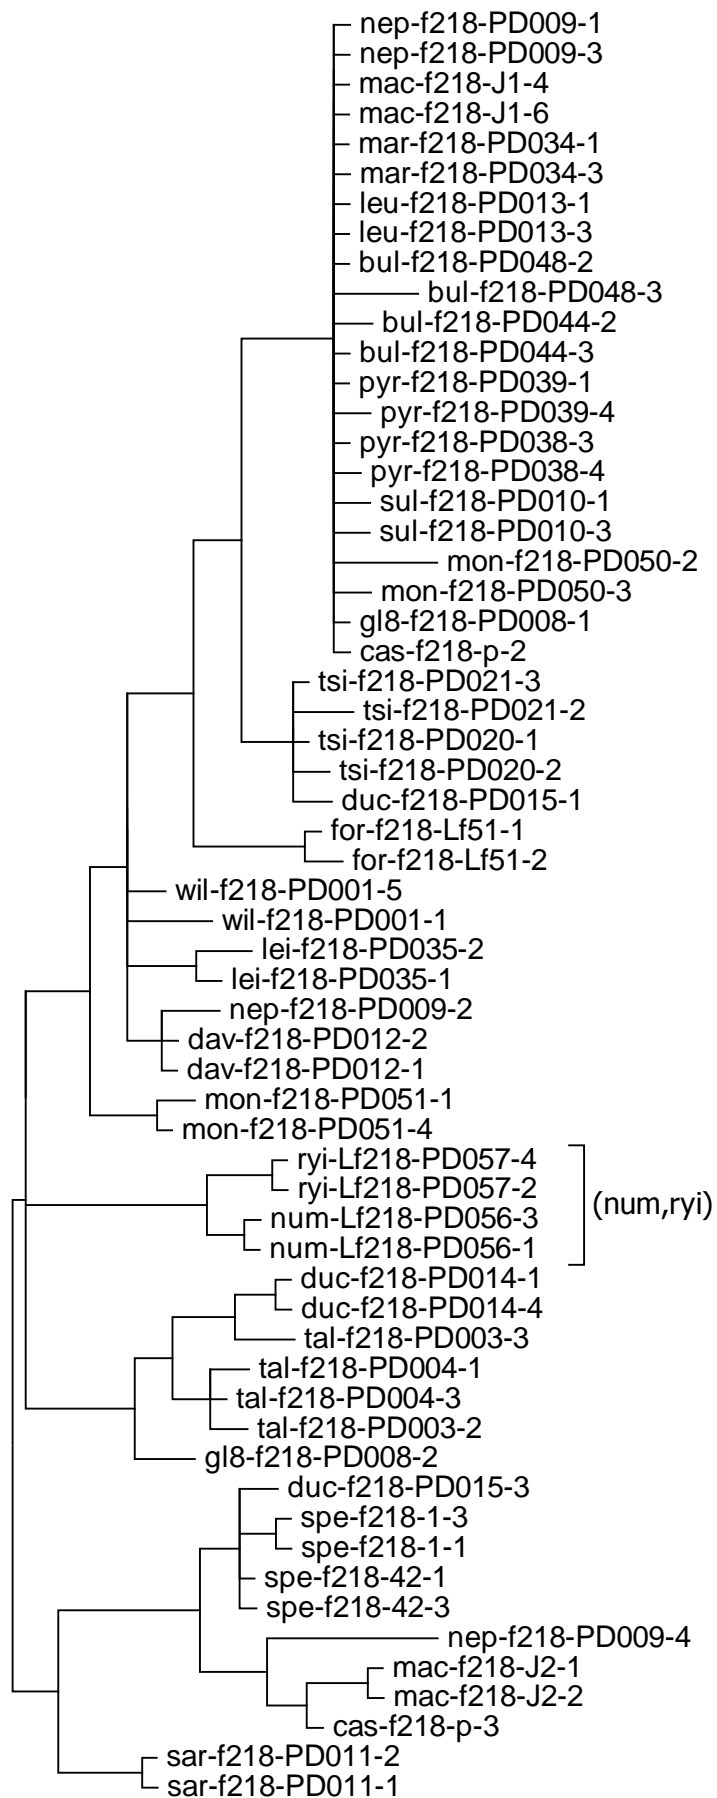

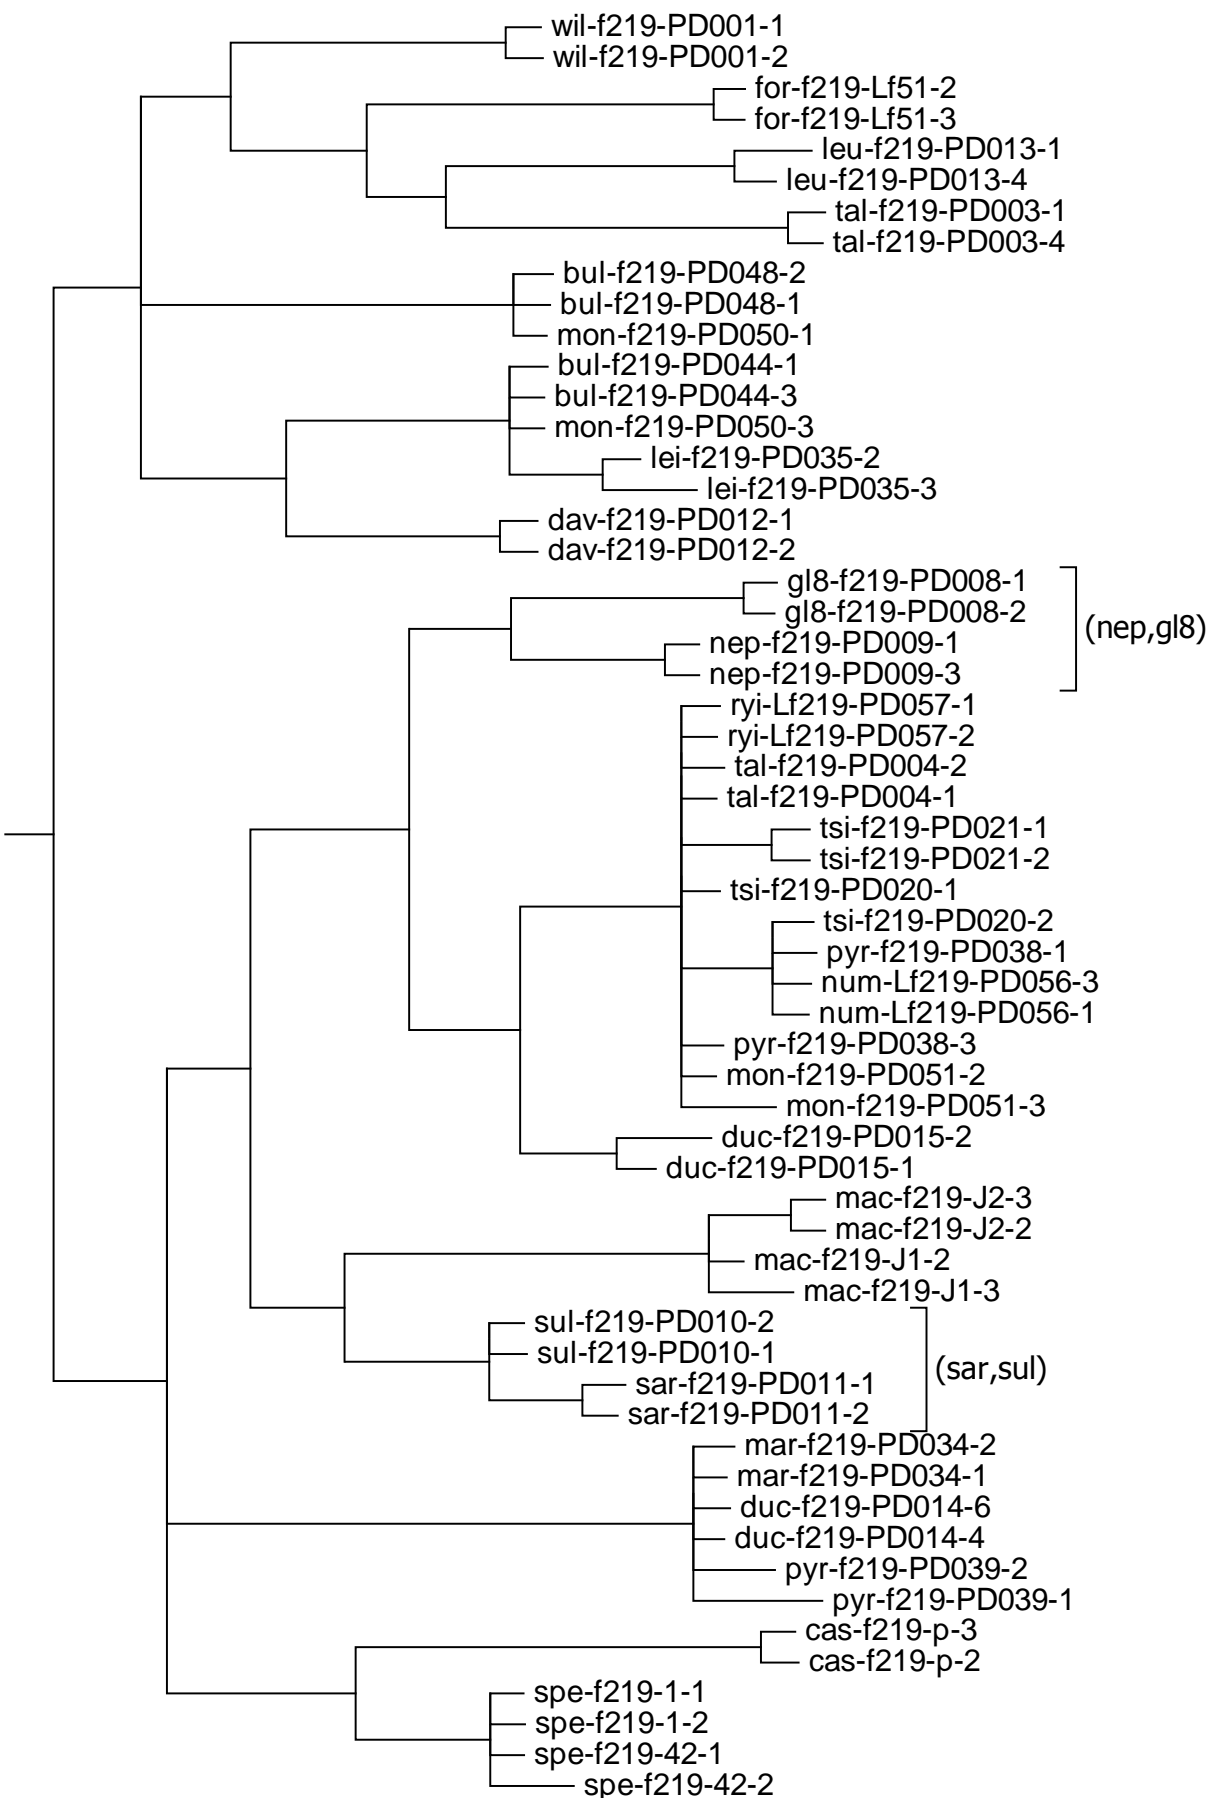

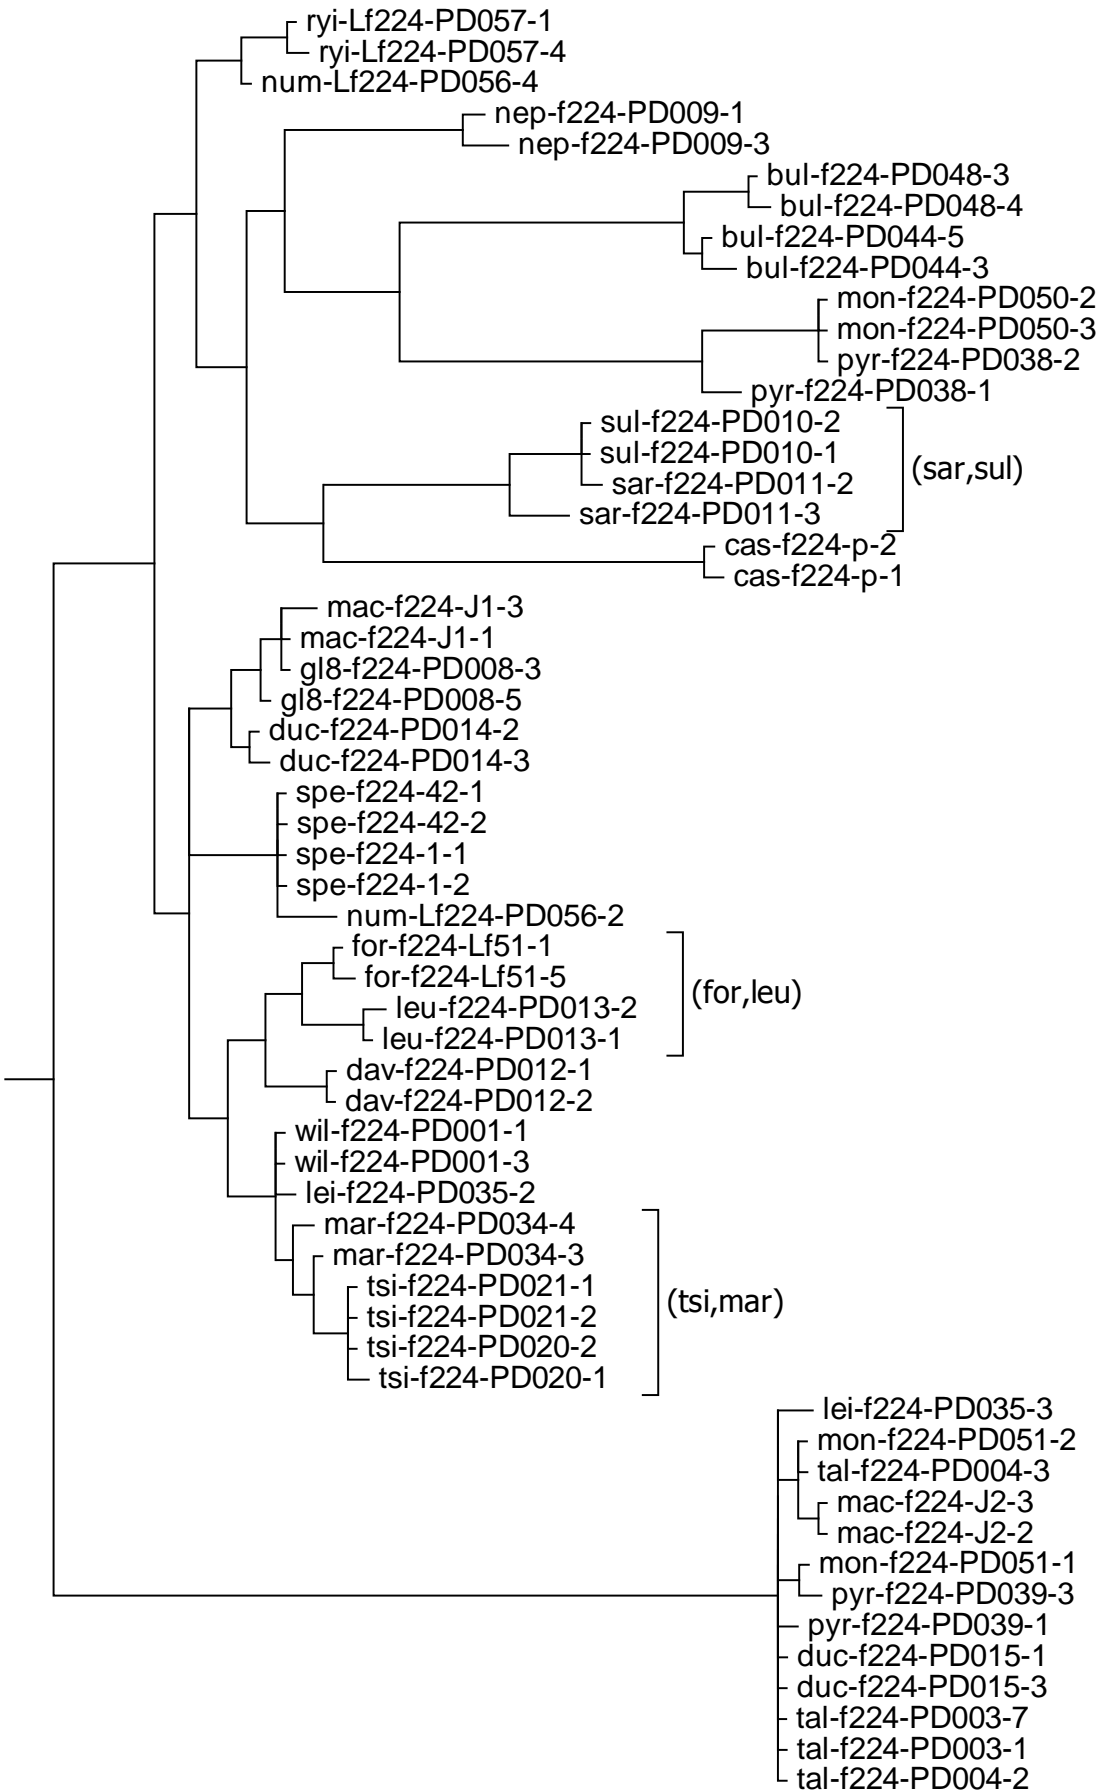

0.02



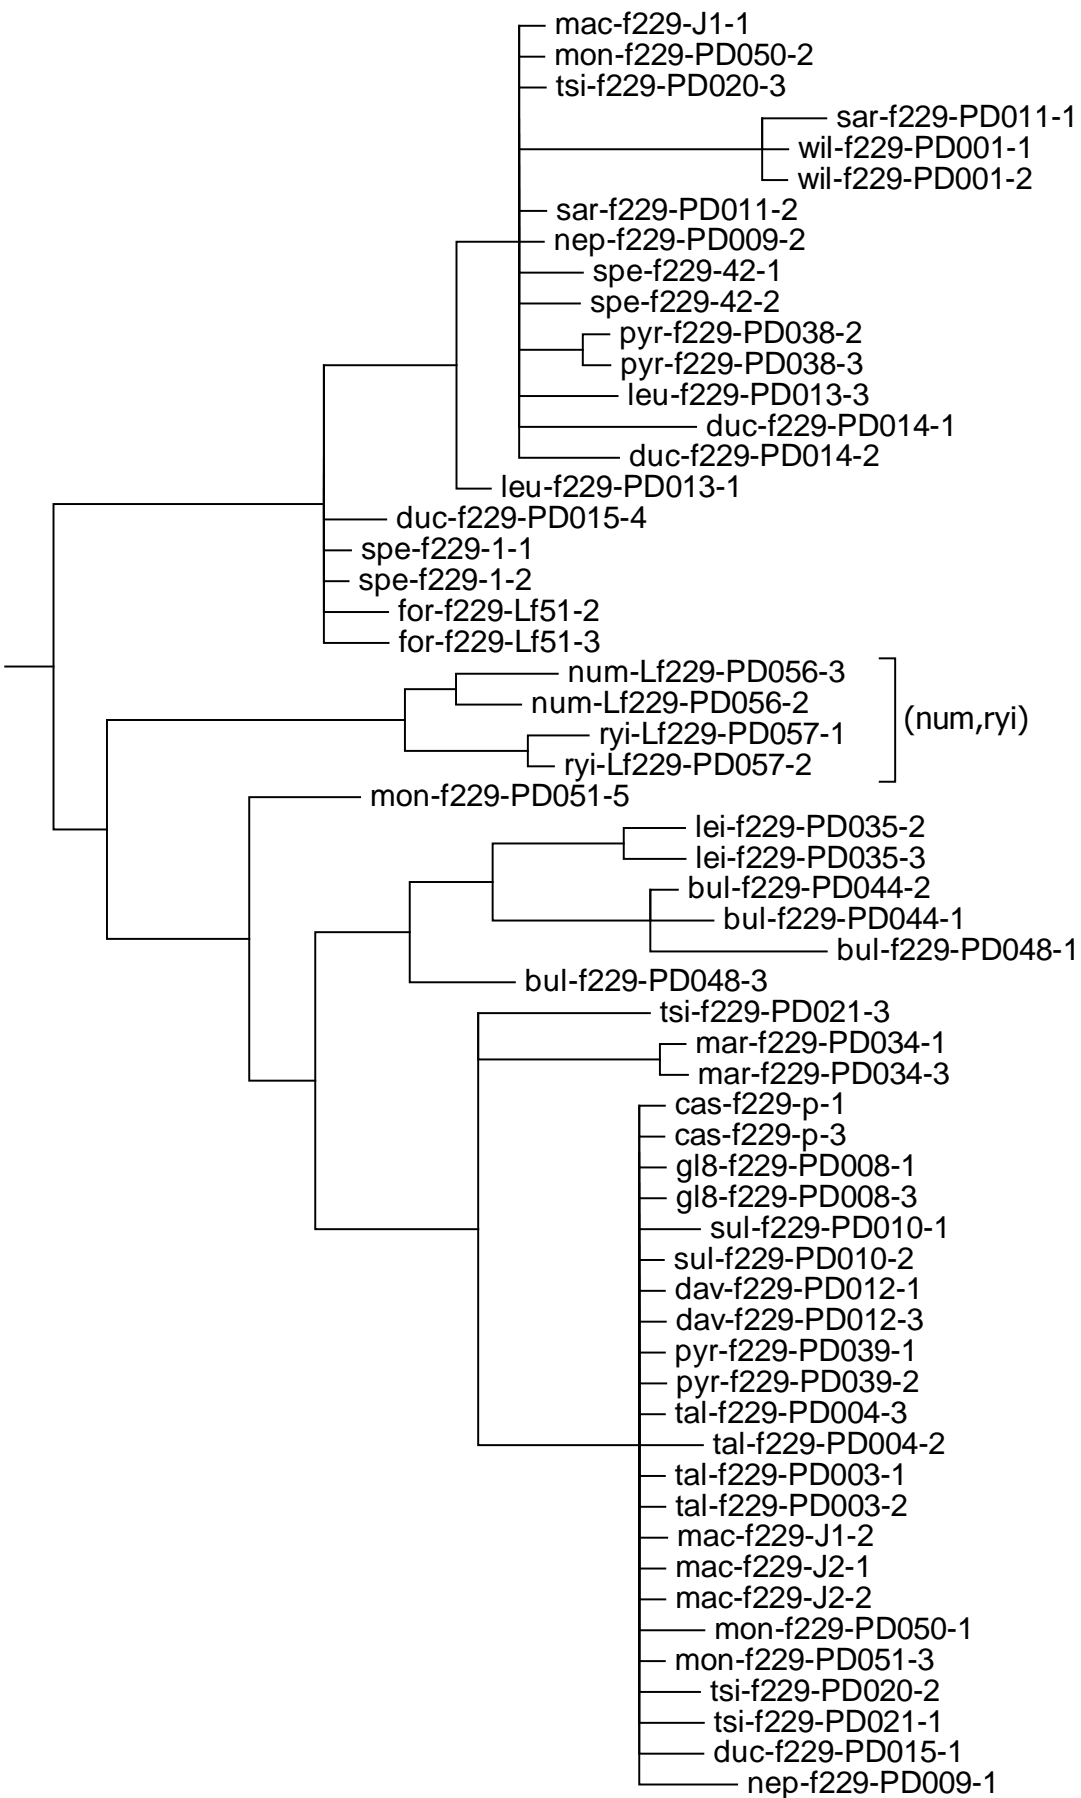

# Lf230

(num,ryi)

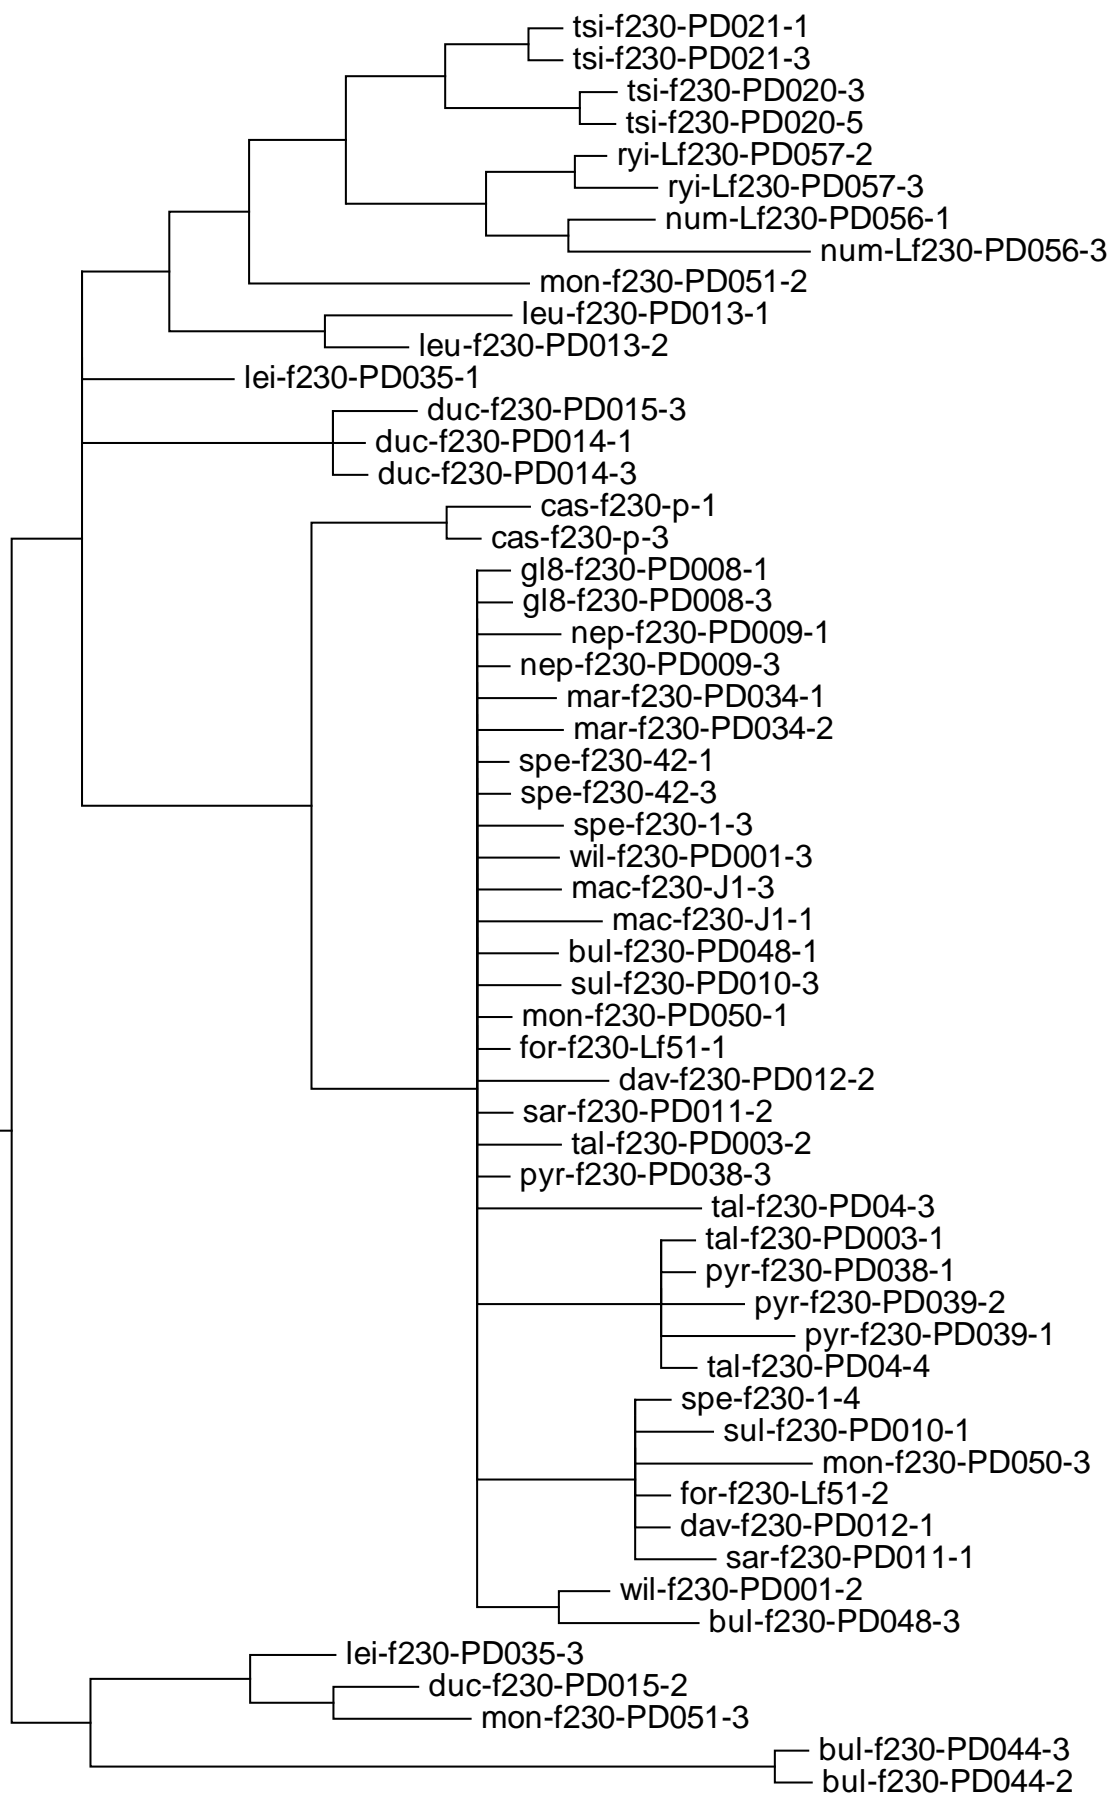

0.005

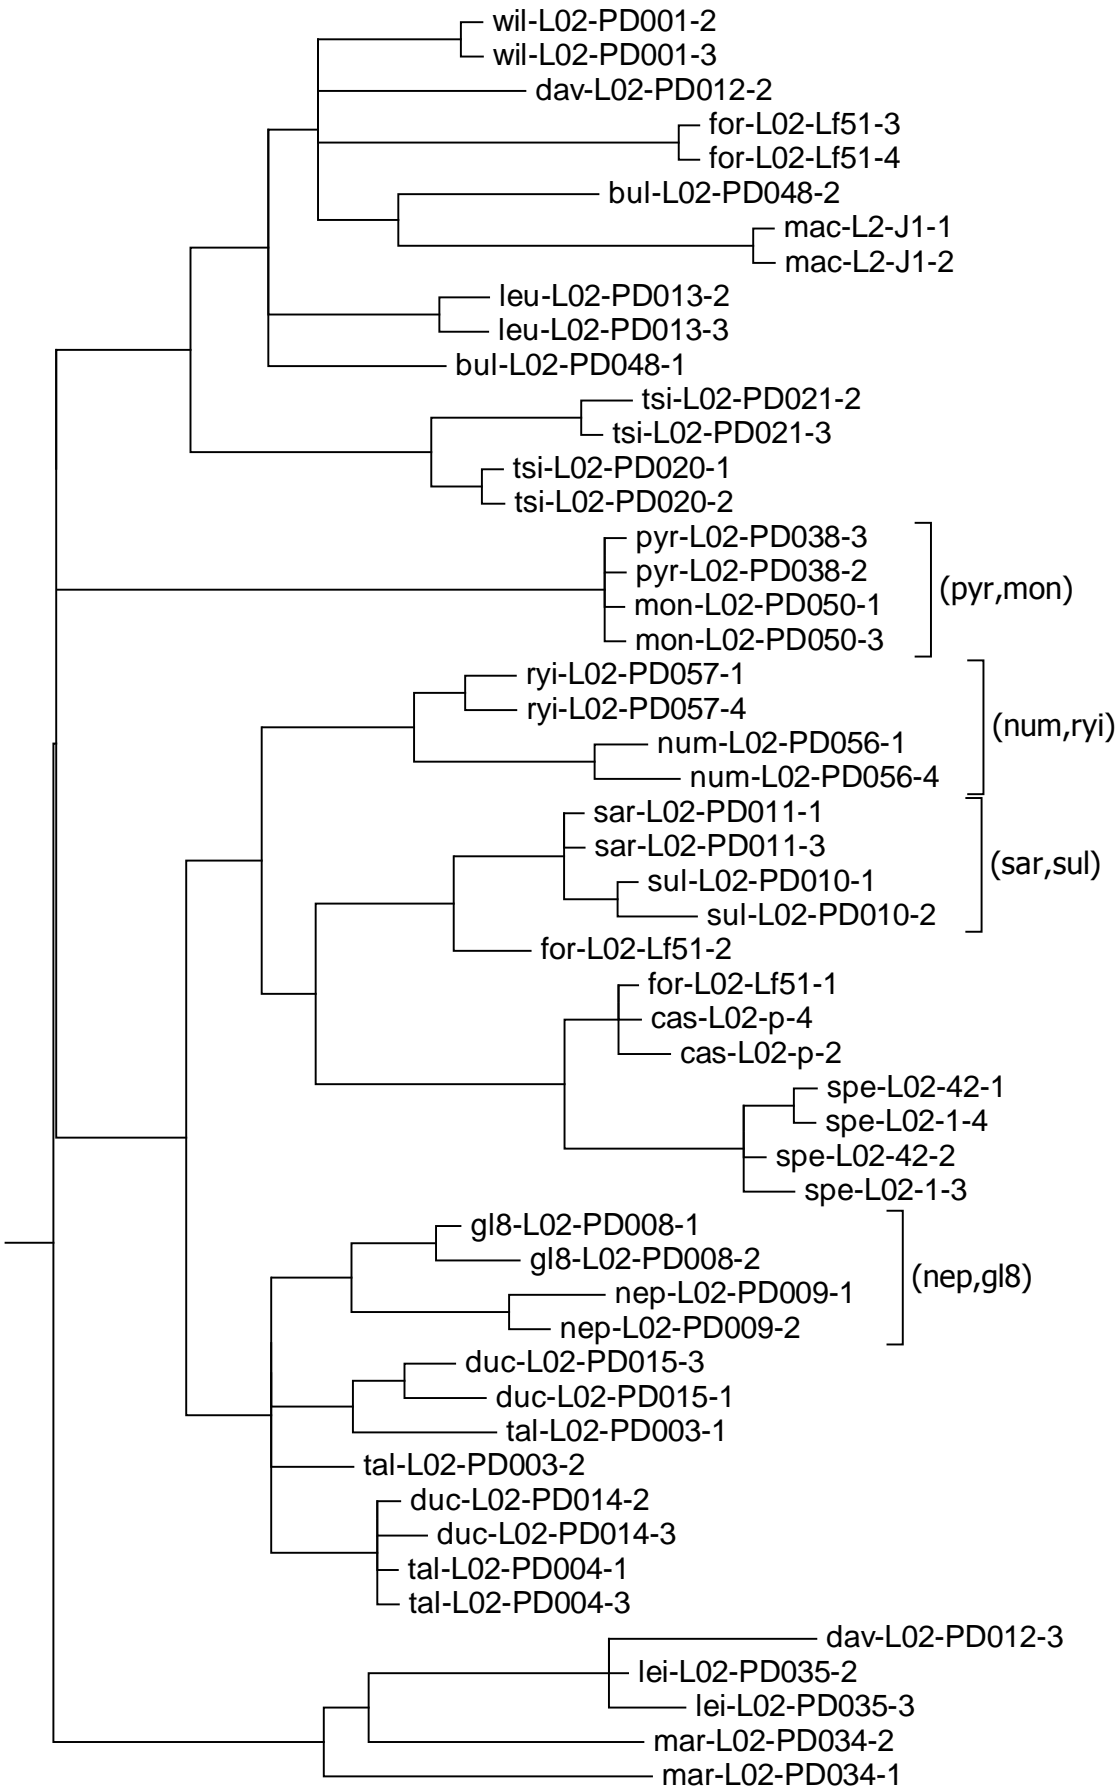

0.005

# LL17

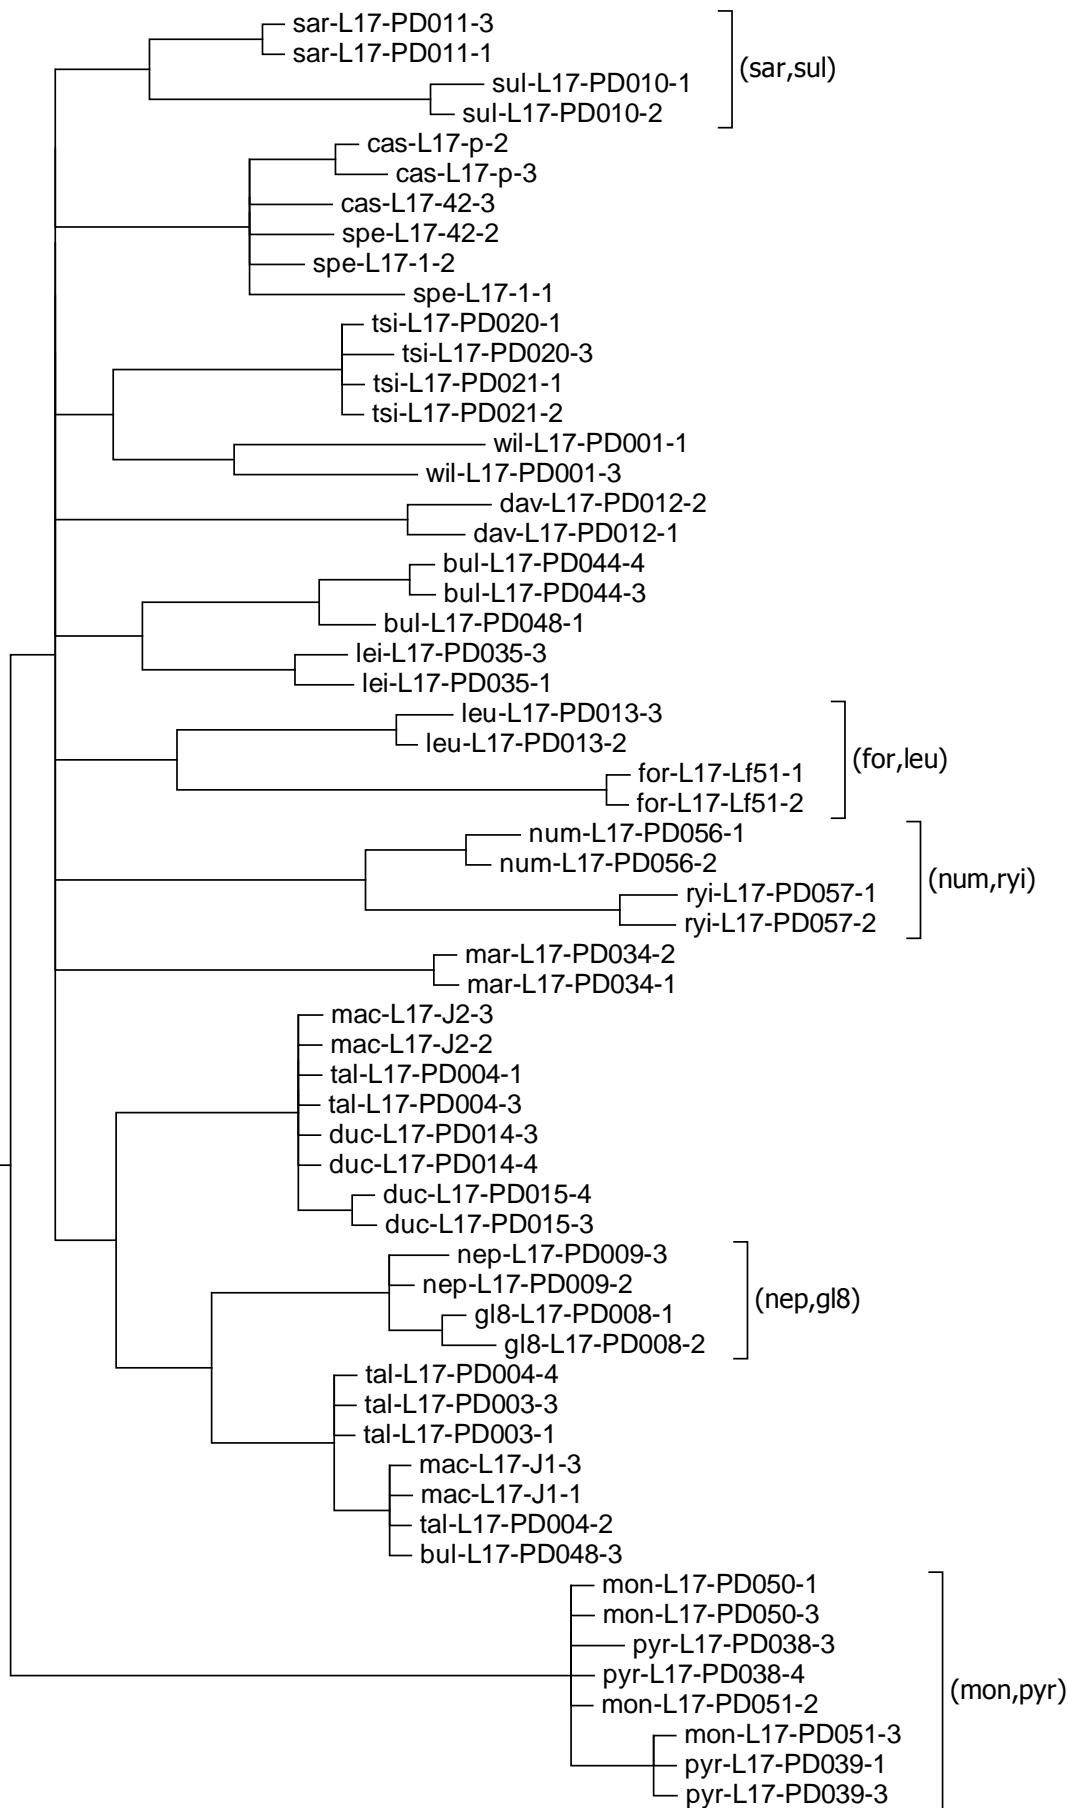

0.005

# LL19

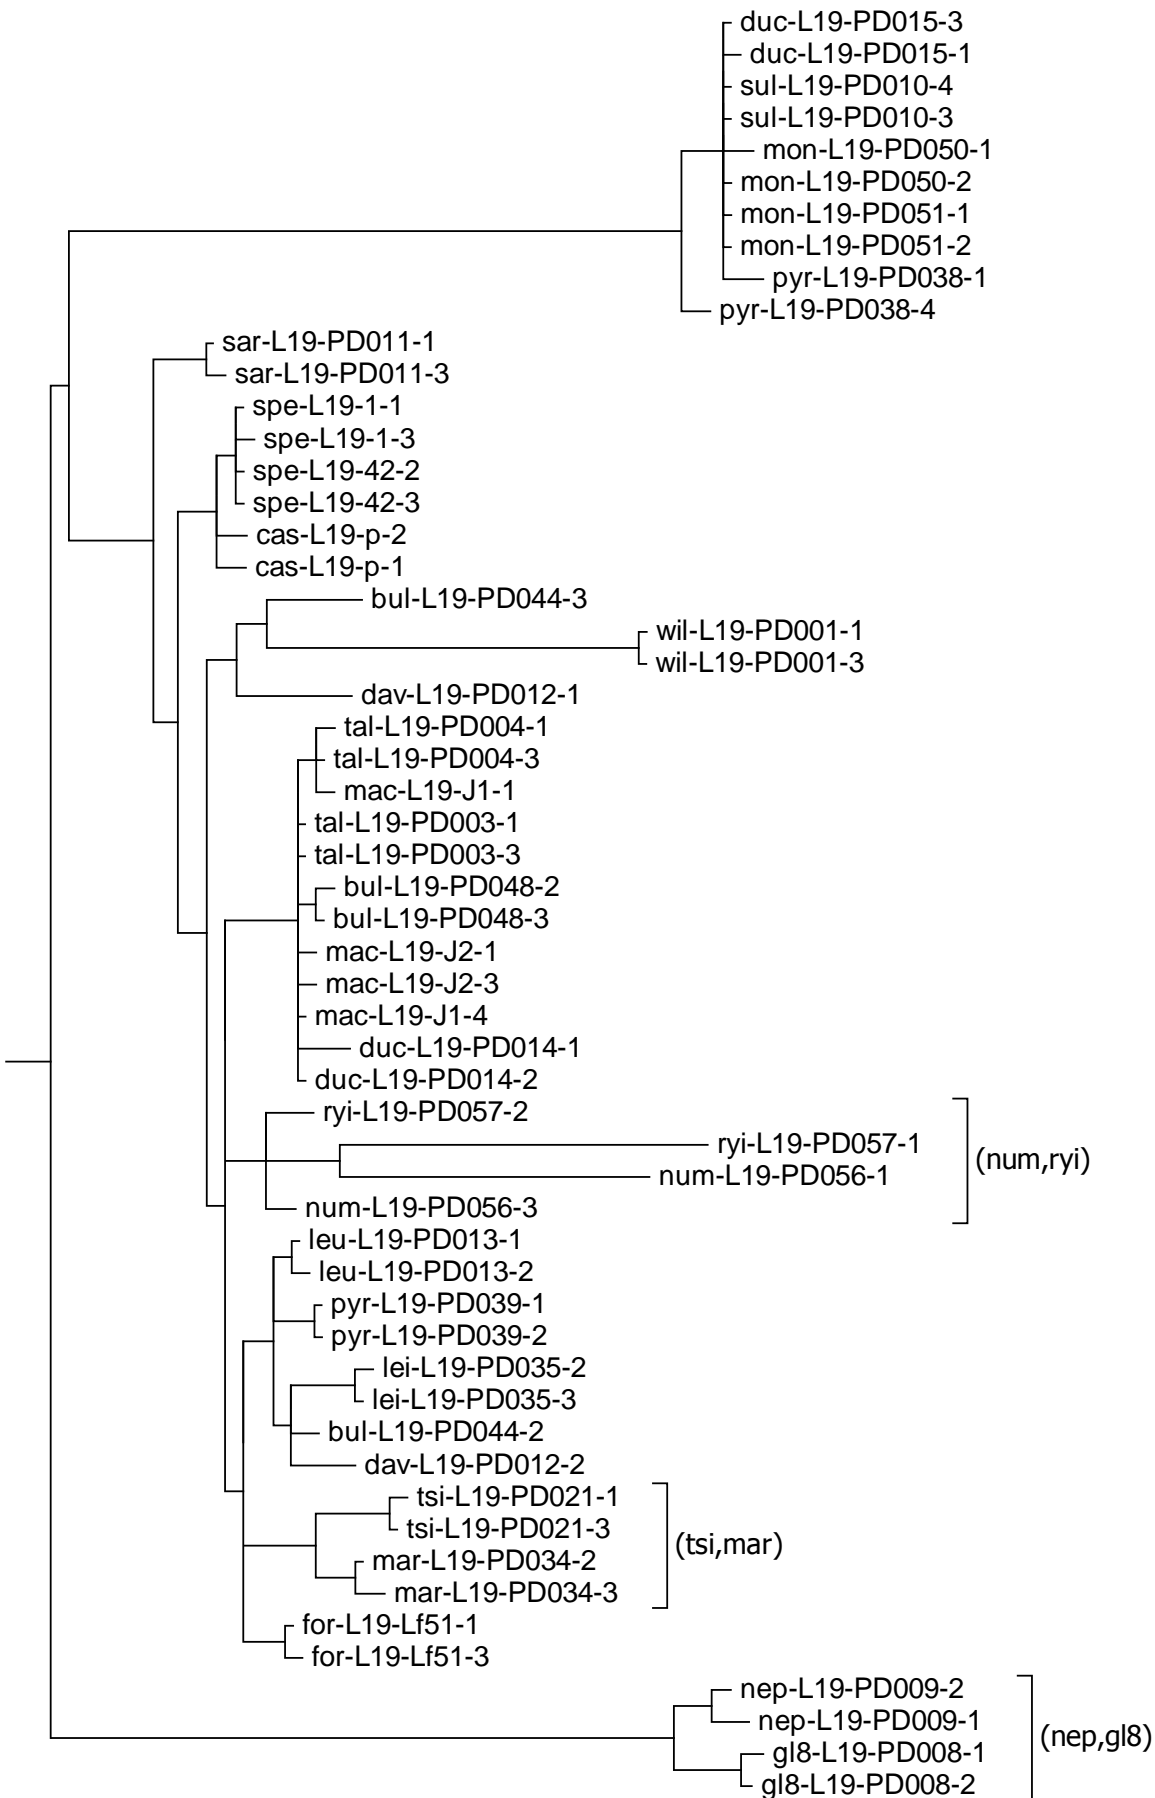

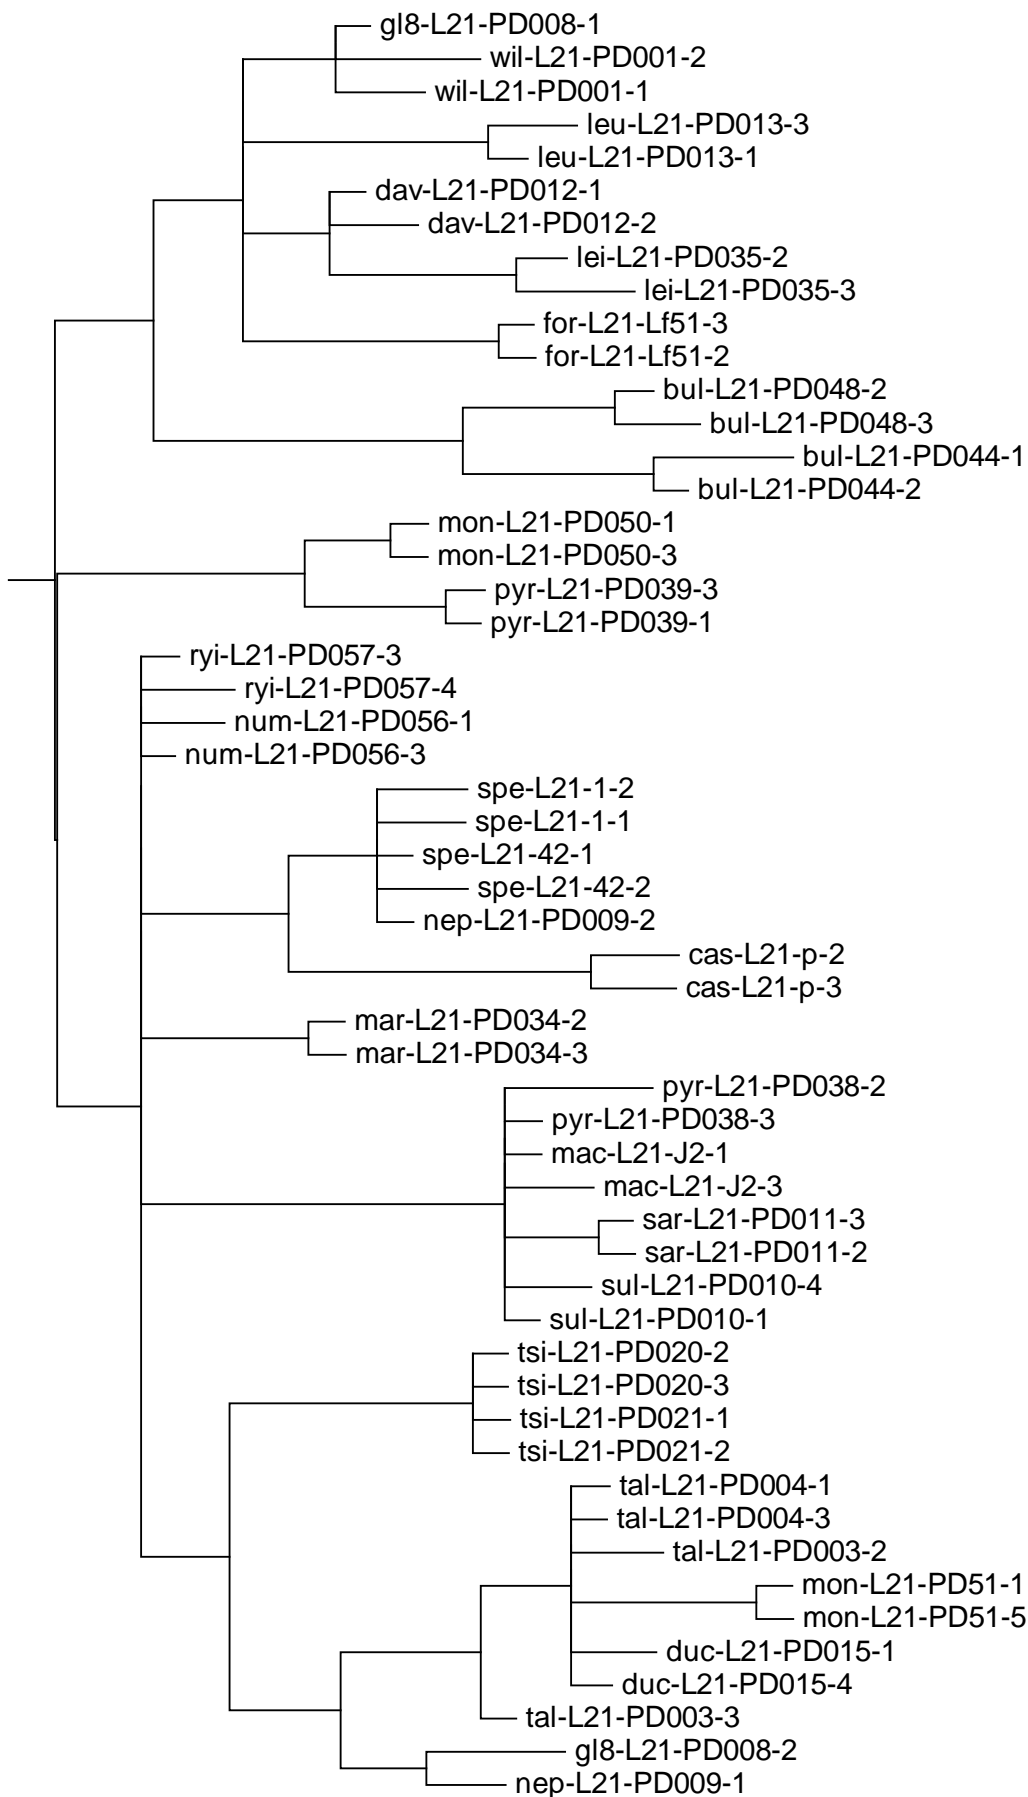

0.002

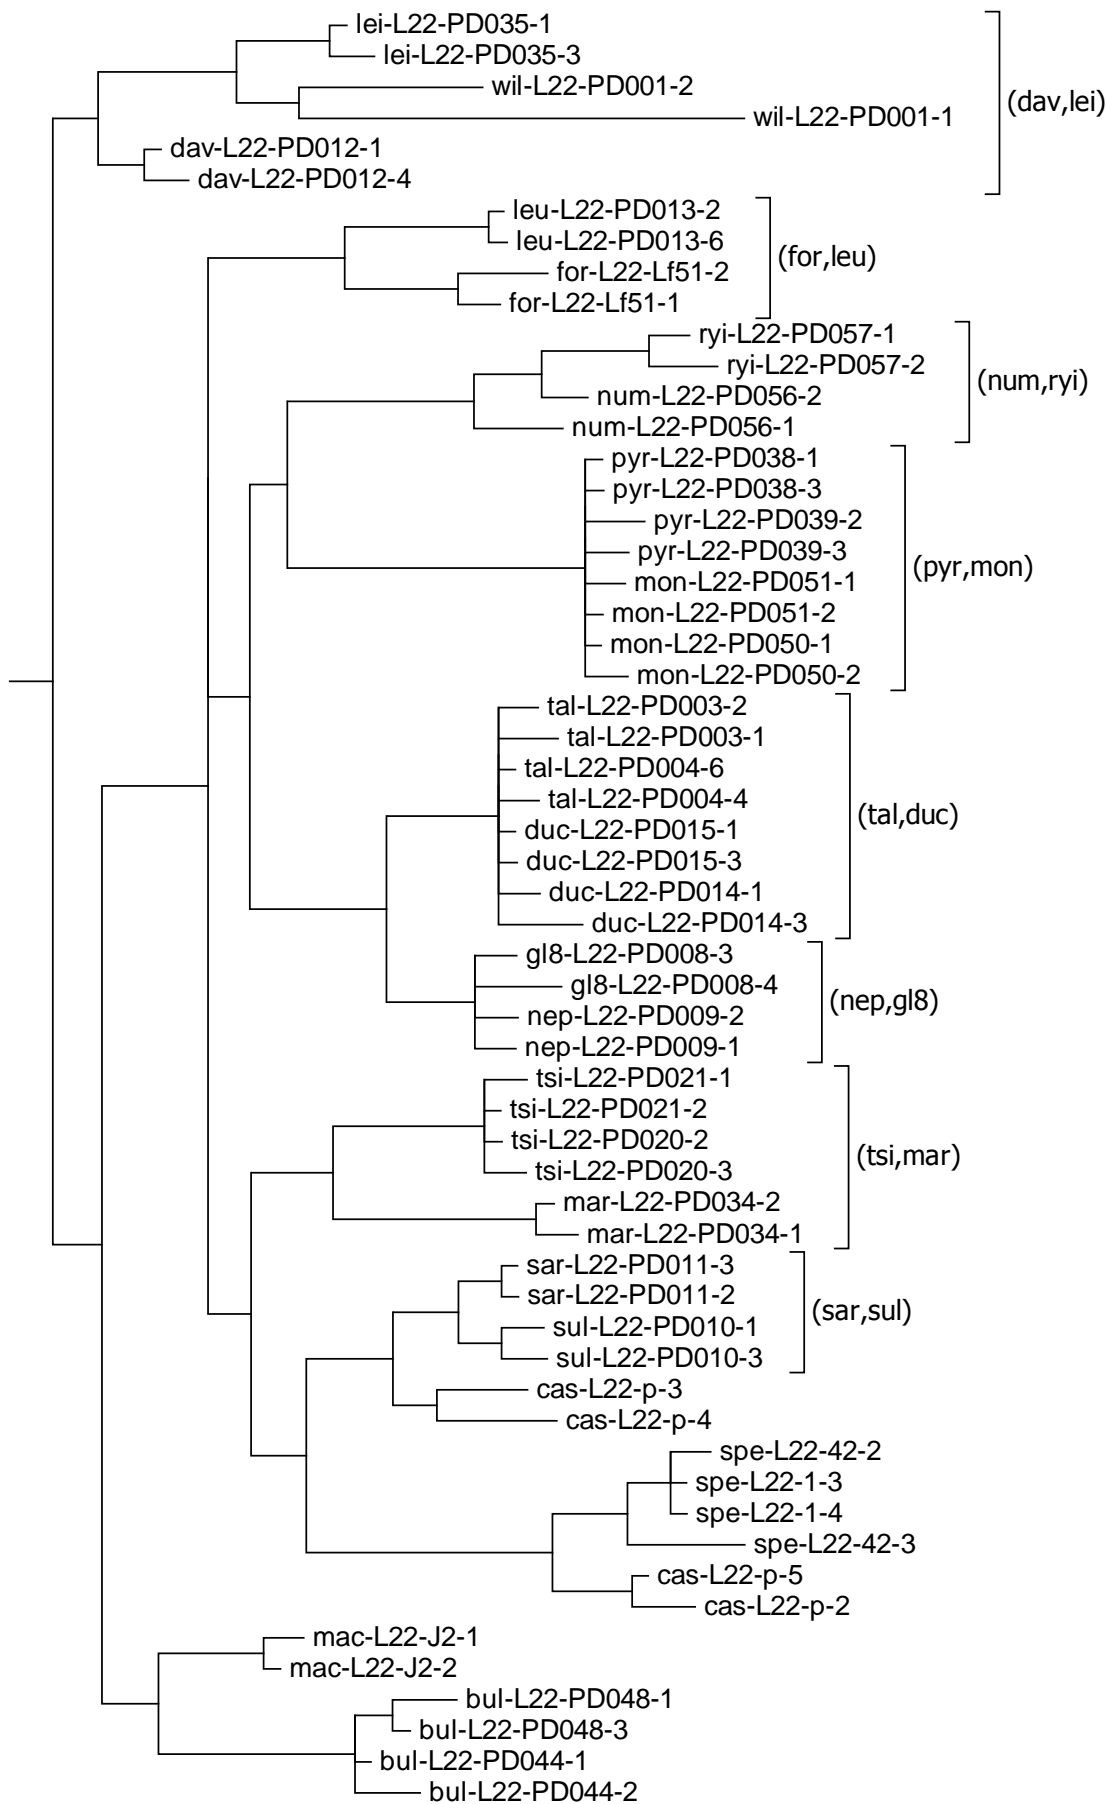

0.005

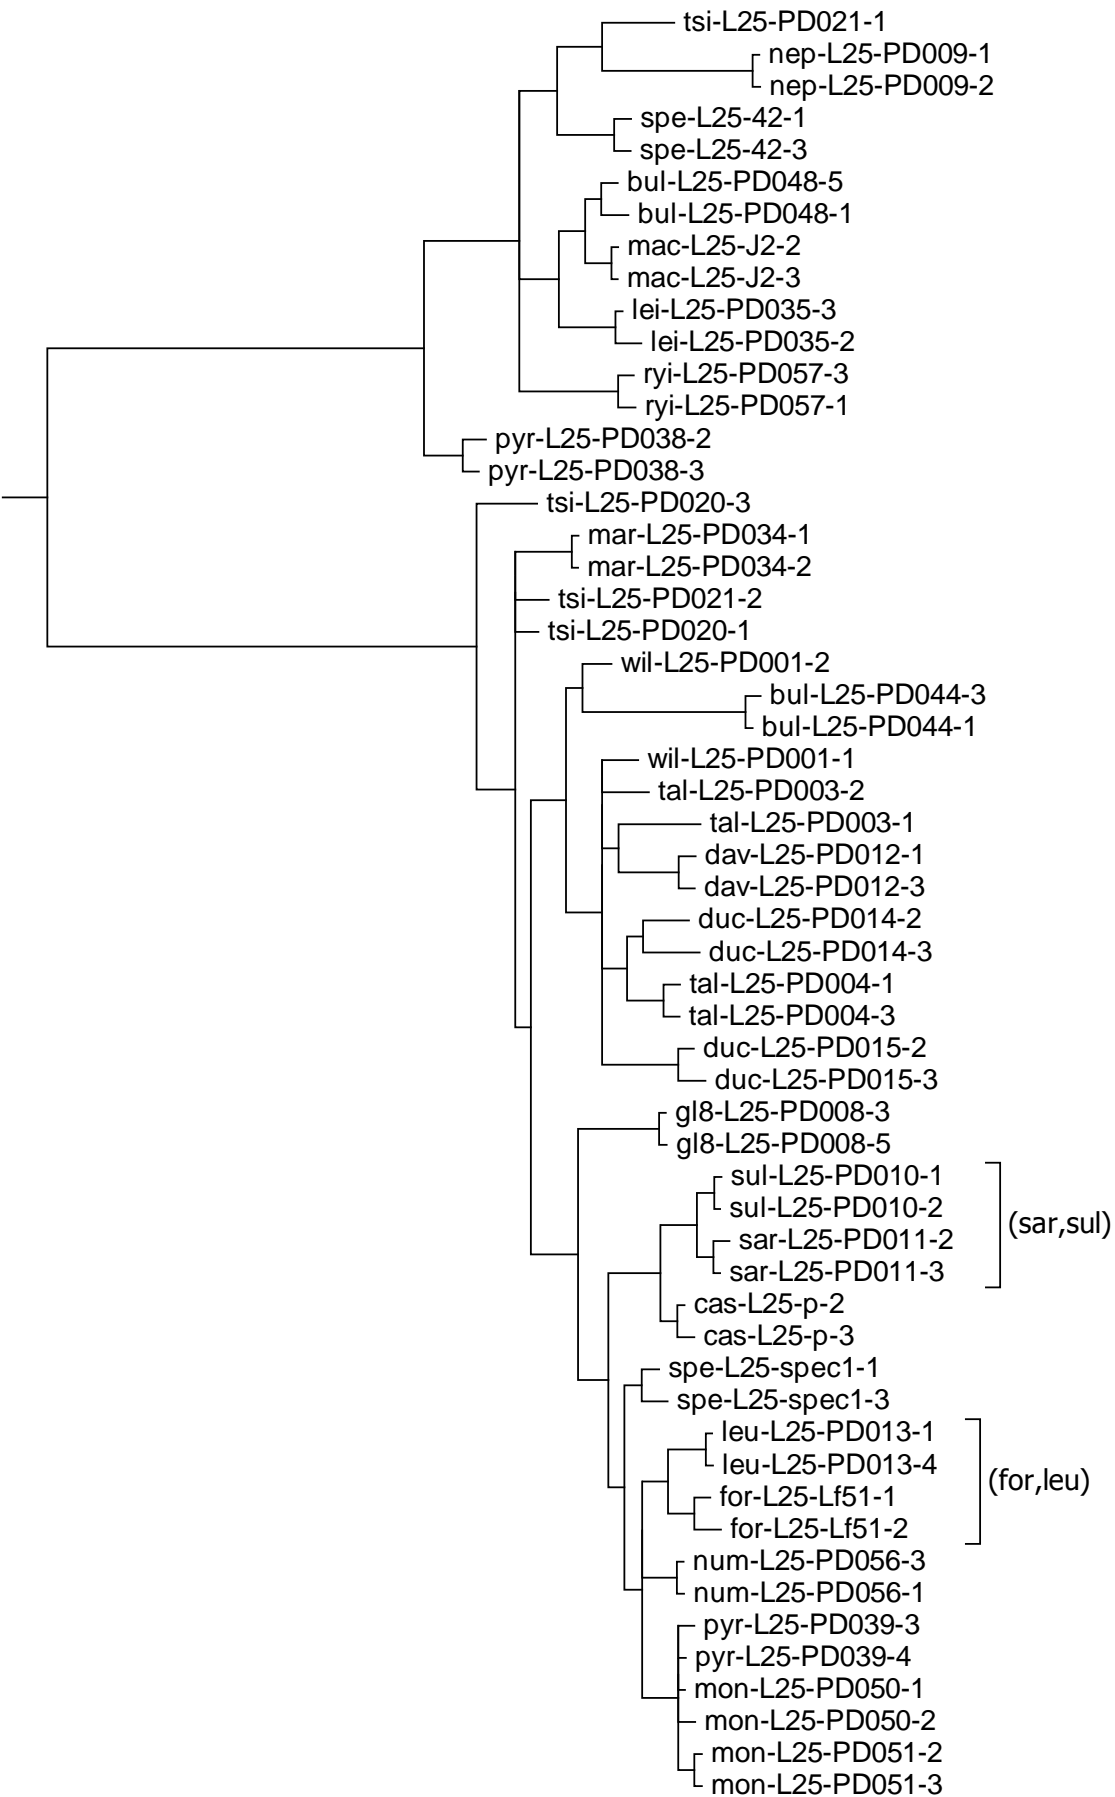

0.02



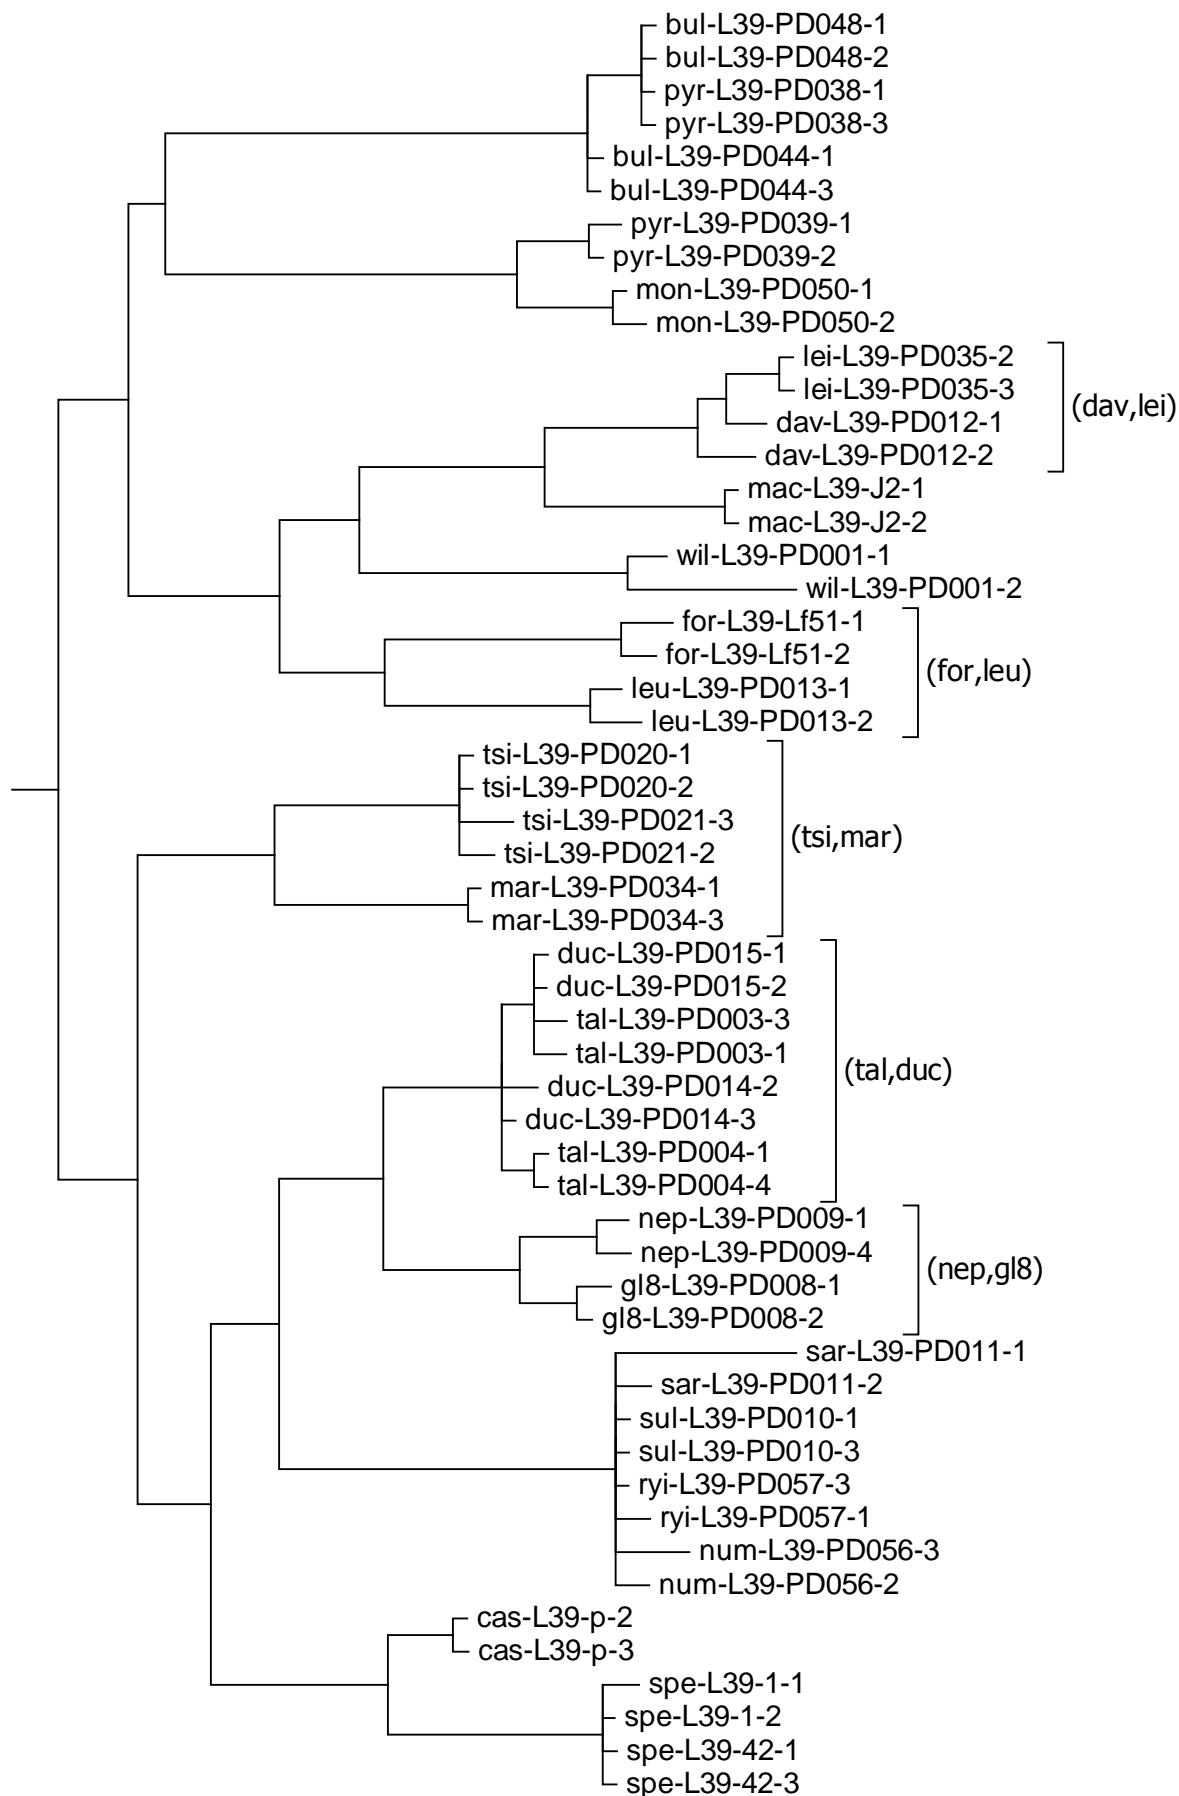

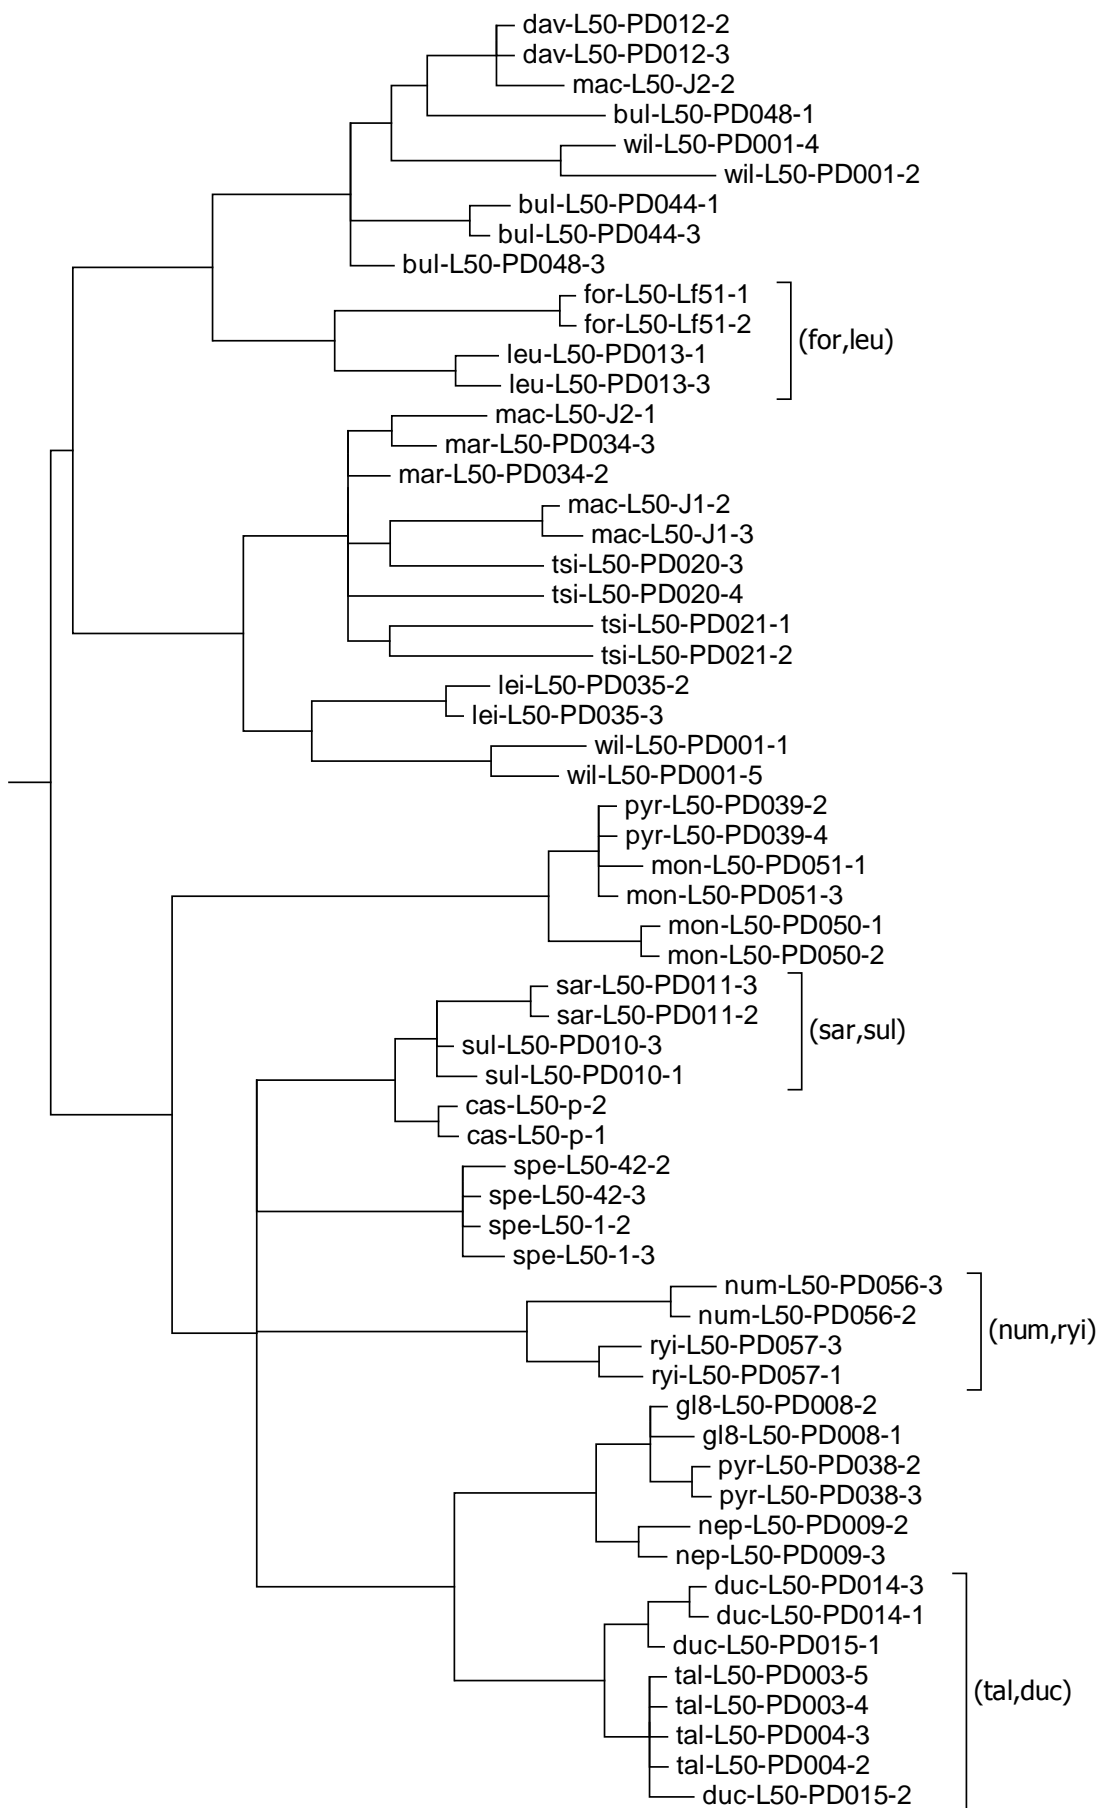

0.005

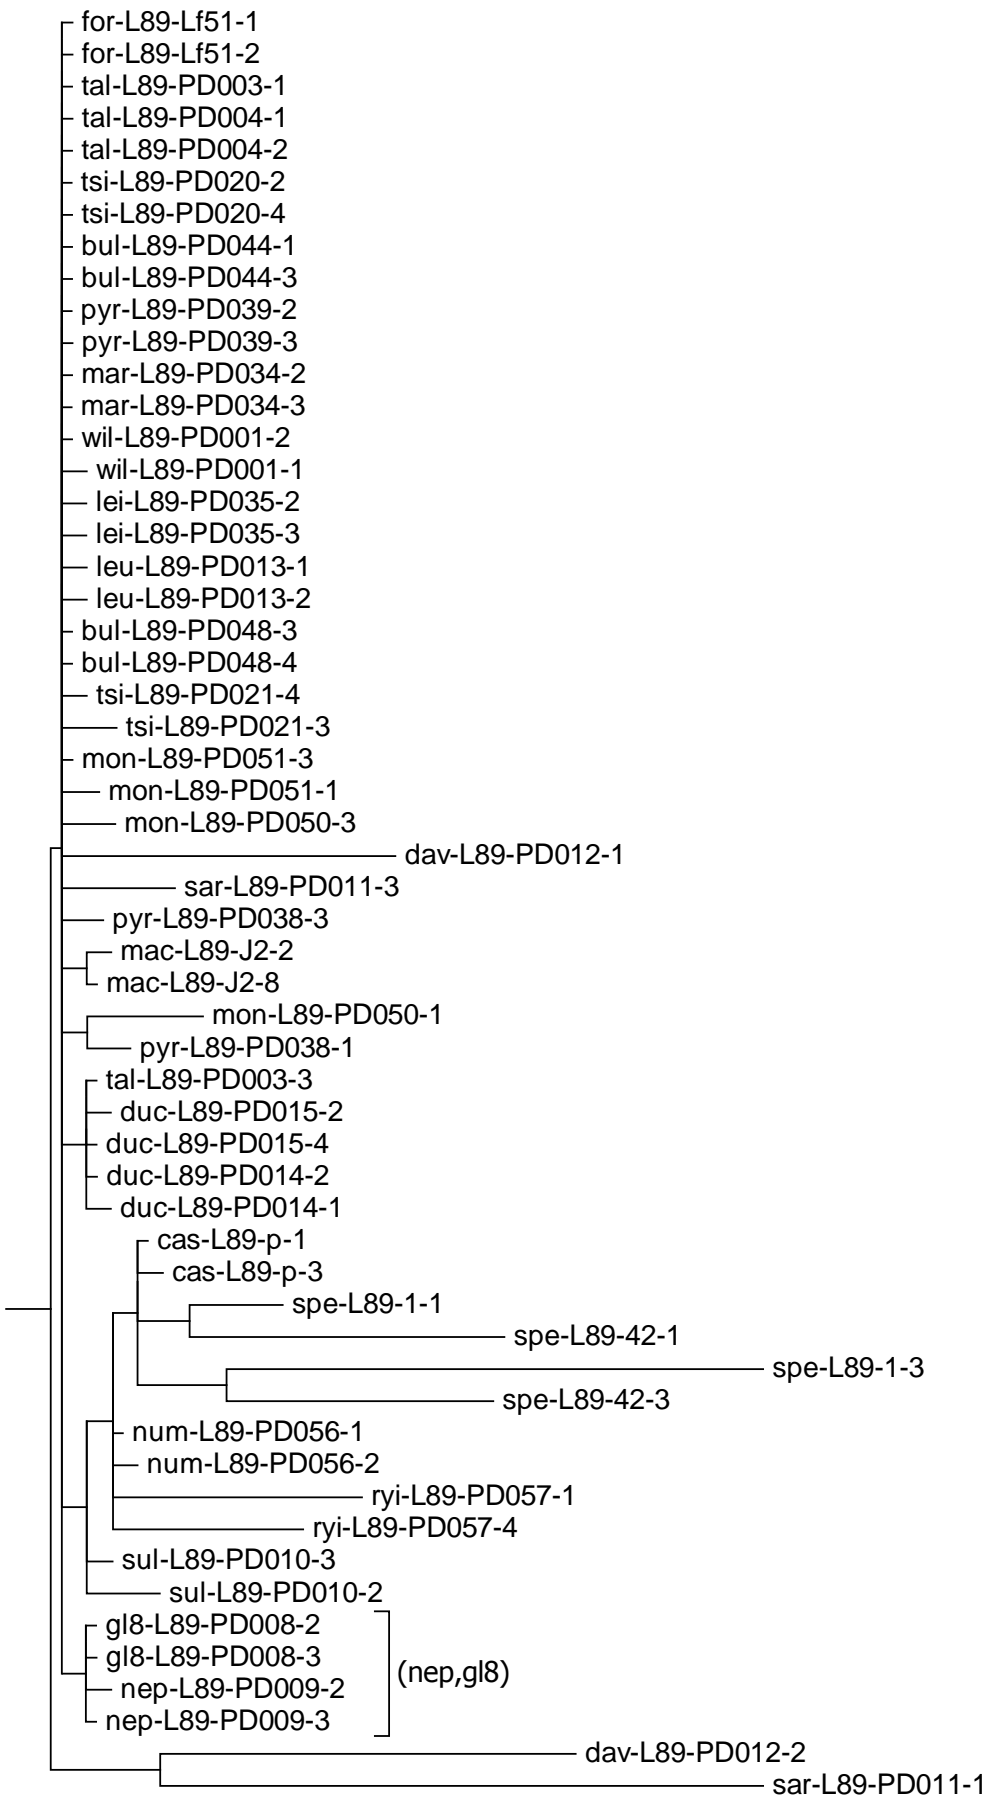

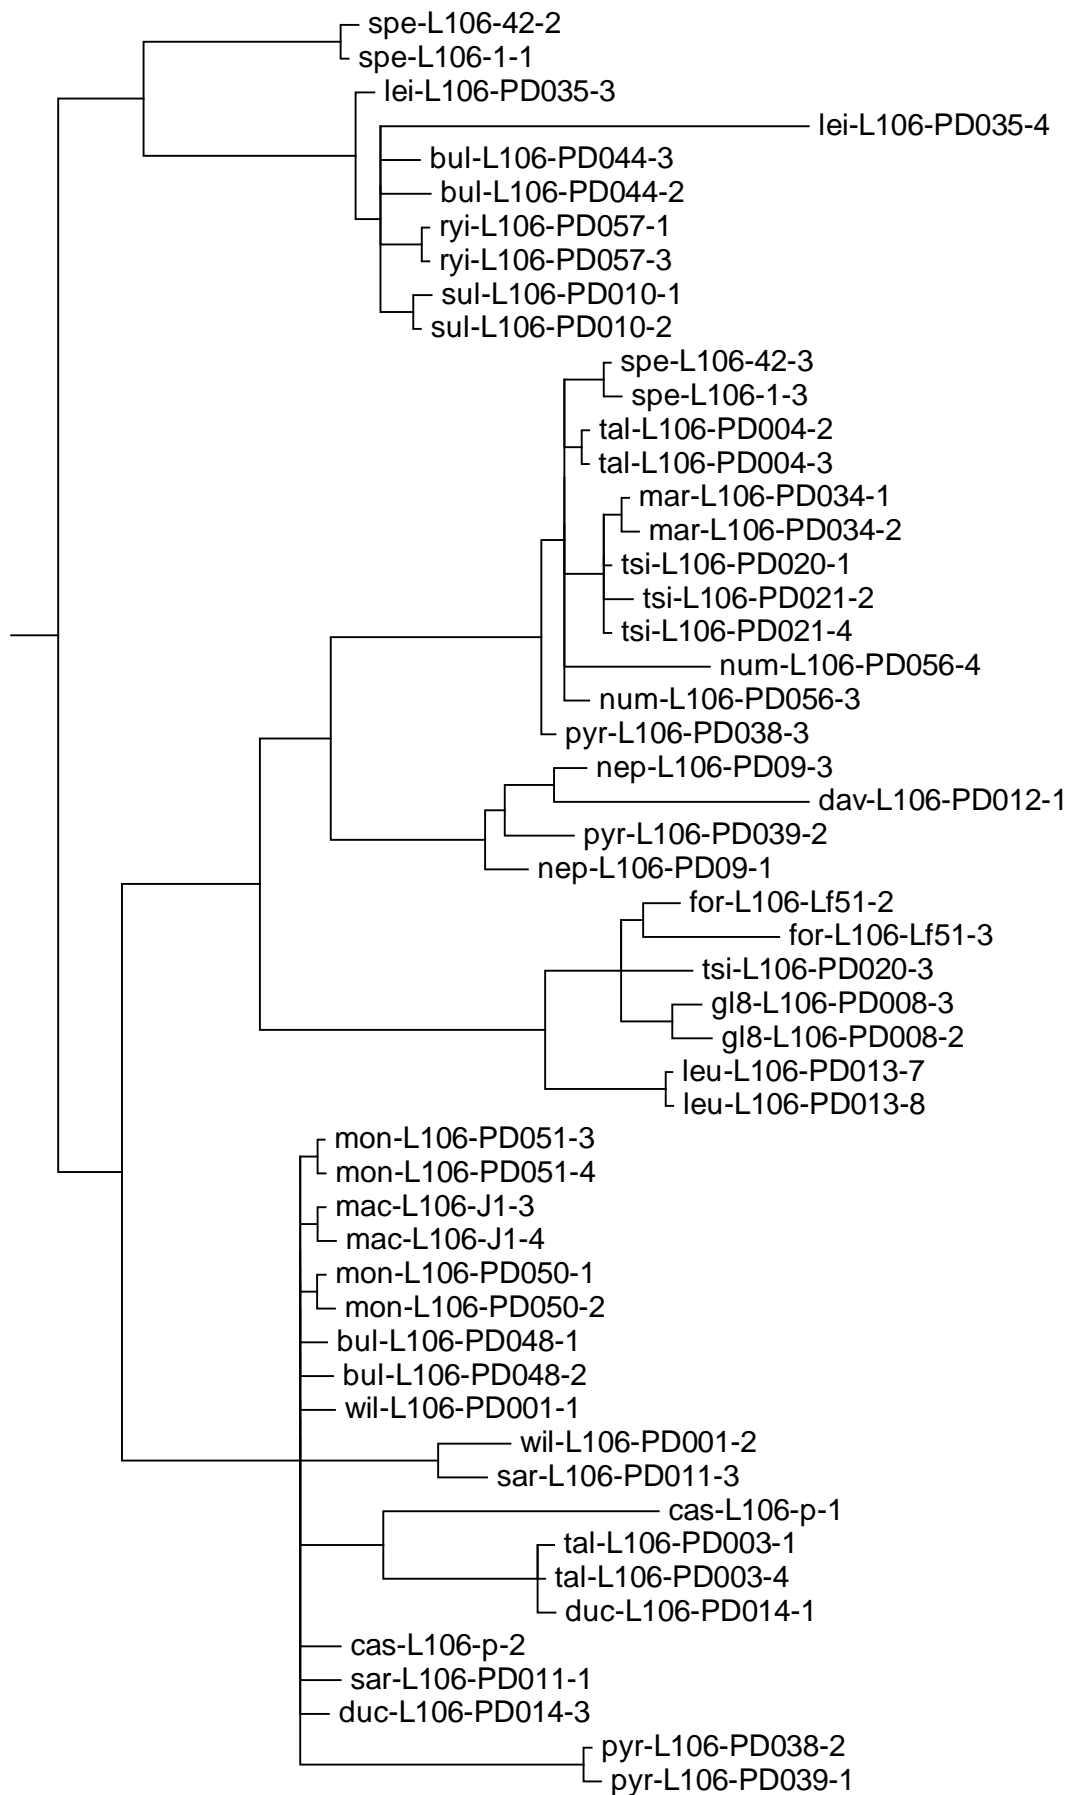

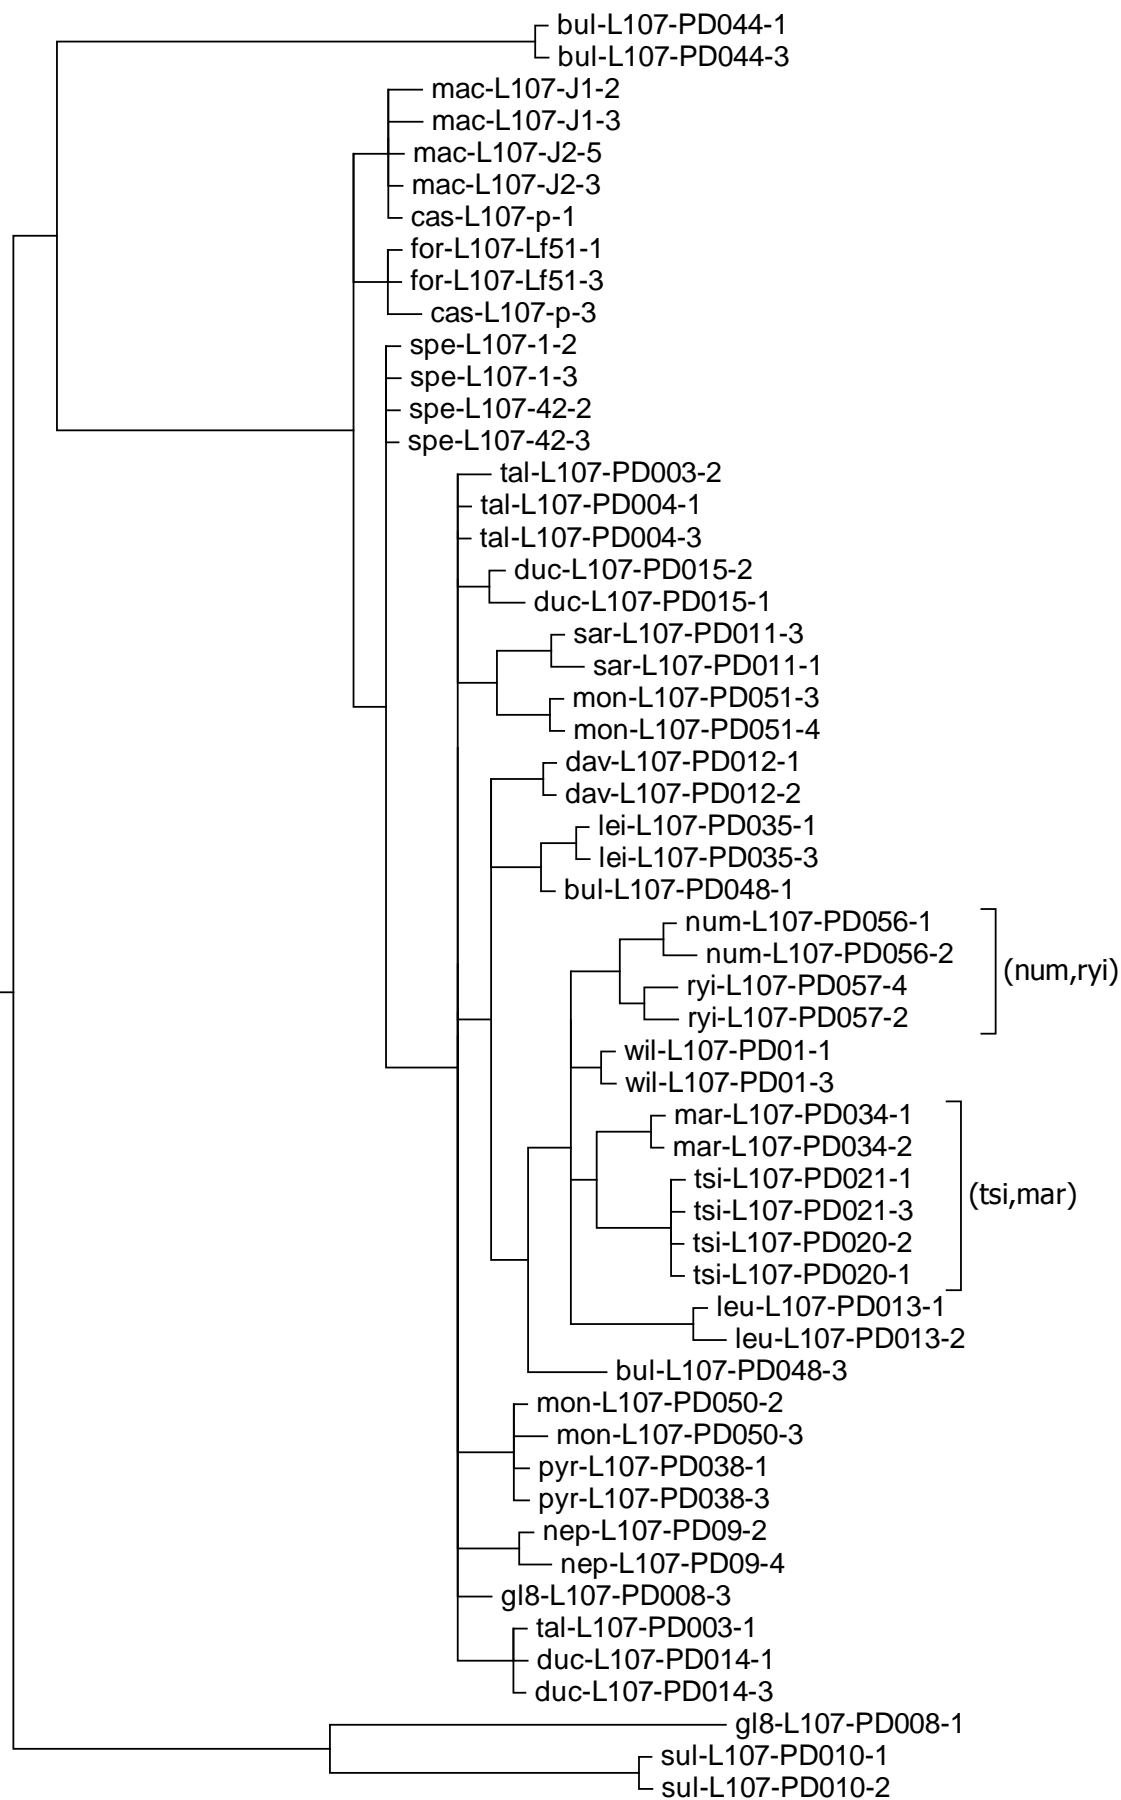

Supplement: pone.0183209.s006.pdf [file pone.0183209.s006.pdf]
